## Immunisation of ferrets and mice with recombinant SARS-CoV-2 spike protein formulated with Advax-SM adjuvant protects against COVID-19 infection

Lei Li<sup>1,2^</sup>, Yoshikazu Honda-Okubo<sup>1,2^</sup>, Ying Huang<sup>3</sup>, Hyesun Jang<sup>3</sup>, Michael A. Carlock<sup>3</sup>, Jeremy Baldwin<sup>1</sup>, Sakshi Piplani<sup>1,2</sup>, Anne G. Bebin-Blackwell<sup>3</sup>, David Forgacs<sup>3</sup>, Kaori Sakamoto<sup>5</sup>, Alberto Stella<sup>6</sup>, Stuart Turville<sup>6</sup>, Tim Chataway<sup>2</sup>, Alex Colella<sup>2</sup>, Jamie Triccas<sup>7</sup>, Ted M Ross<sup>3,4#</sup>, Nikolai Petrovsky<sup>1,2#</sup>

<sup>1</sup>Vaxine Pty Ltd., Bedford Park, Adelaide 5042, SA, Australia, <sup>2</sup>College of Medicine and Public Health, Flinders University, Adelaide 5042, SA, Australia, <sup>3</sup>Center for Vaccines and Immunology, University of Georgia, Athens, GA, USA <sup>4</sup>Department of Infectious Diseases, University of Georgia, Athens, GA, USA <sup>5</sup>Department of Pathology, University of Georgia, Athens, GA, USA, <sup>6</sup>Centre for Virus Research, Westmead Millennium Institute, Westmead Hospital and University of Sydney, Sydney, 2145, NSW, Australia, <sup>7</sup>School of Medical Sciences and Marie Bashir Institute, University of Sydney, Sydney, NSW 2006, Australia

^Contributed equally as first authors. # Senior co-authors,

Corresponding author [nikolai.petrovsky@flinders.edu.au](mailto:nikolai.petrovsky@flinders.edu.au)

### Abstract

The development of a safe and effective vaccine is a key requirement to overcoming the COVID-19 pandemic. Recombinant proteins represent the most reliable and safe vaccine approach but generally require a suitable adjuvant for robust and durable immunity. We used the SARS-CoV-2 genomic sequence and *in silico* structural modelling to design a recombinant spike protein vaccine (Covax-19™). A synthetic gene encoding the spike extracellular domain (ECD) was inserted into a baculovirus backbone to express the protein in insect cell cultures. The spike ECD was formulated with Advax-SM adjuvant and first tested for immunogenicity in C57BL/6 and BALB/c mice. The Advax-SM adjuvanted vaccine induced high titers of binding antibody against spike protein that were able to neutralise the original wildtype virus on which the vaccine was based as well as the variant B.1.1.7 lineage virus. The Covax-19 vaccine also induced potent spike-specific CD4+ and CD8+ memory T-cells with a dominant Th1 phenotype, and this was shown to be associated with cytotoxic T lymphocyte killing of spike labelled target cells *in vivo*. Ferrets immunised with Covax-19 vaccine intramuscularly twice 2 weeks apart made spike receptor binding domain (RBD) IgG and were protected against an intranasal challenge with SARS-CoV-2 virus 2 weeks after the second immunisation. Notably, ferrets that received two 25 or 50µg doses of Covax-19 vaccine had no detectable virus in their lungs or in nasal washes at day 3 post-challenge, suggesting the possibility that Covax-19 vaccine may in addition to protection against lung infection also have the potential to block virus transmission. This data supports advancement of Covax-19 vaccine into human clinical trials.

1 **Introduction:**

2 COVID-19 is caused by lung infection with severe acute respiratory syndrome coronavirus-2 (SARS-  
3 CoV-2)[1]. To date, there have been over 176 million reported COVID-19 cases in over 215 countries  
4 with greater than 3.8 million confirmed deaths [2]. SARS-CoV-2 causes a constellation of clinical  
5 outcomes from asymptomatic infection to respiratory failure and death [3]. Although public health  
6 strategies, such as social distancing, masks and quarantine, have helped control virus transmission,  
7 many countries are experiencing second and third waves of cases [4] including with virus variants of  
8 concern with increased virulence [5]. Global efforts are currently underway to develop COVID-19  
9 vaccines [6] including live virus vectors, inactivated viruses, nucleic acids (DNA or RNA) and  
10 recombinant proteins [7]. Although several vaccines have received emergency-use authorisation,  
11 ongoing questions include likely duration of vaccine protection, long-term safety, potential for  
12 antibody-enhanced disease, activity against variant strains and immune correlates of vaccine  
13 protection [8-10].

14

15 Recombinant or inactivated protein vaccines are a safe and reliable approach but generally suffer from  
16 weak immunogenicity unless formulated with an appropriate adjuvant [11]. Adjuvants induce higher  
17 and more durable immune responses and can also be used to impart a relevant T helper bias to the  
18 immune effector response [12] and can overcome immune impairment seen with advancing age or  
19 chronic disease [13]. Advax-SM is a new combination adjuvant consisting of delta inulin  
20 polysaccharide particles (Advax™) formulated with the Toll-like receptor 9 (TLR9)-active  
21 oligonucleotide, CpG55.2. A similar adjuvant approach provided enhanced protection of recombinant  
22 spike protein vaccines against severe acute respiratory syndrome (SARS) and Middle East respiratory  
23 syndrome (MERS), coronaviruses [14, 15]. The Th1-bias imparted by the adjuvant also prevented the  
24 eosinophilic lung immunopathology otherwise seen after immunisation with SARS spike protein alone  
25 or with alum adjuvant [14]. Advax adjuvant has been shown to be safe and effective in human vaccines  
26 against seasonal and pandemic influenza [16, 17] and hepatitis B [18].

27

28 Advanced computer modelling techniques may be useful to accelerate pandemic vaccine design. This  
29 study describes how we used a range of approaches including computer modelling to characterise the  
30 SARS-CoV-2 spike protein from the genomic sequence, and then used a modelled 3-D structure to  
31 identify angiotensin converting enzyme 2 (ACE2) as the relevant human receptor. We then utilised our  
32 computer model to design a vaccine from the extracellular domain (ECD) of the SARS-CoV-2 spike  
33 protein, to test the hypothesis that this antigen when formulated with Advax-SM adjuvant would  
34 induce neutralising antibodies able to block the binding of the SARS-CoV-2 virus to ACE2 thereby

35 preventing infection. While our study was in progress others confirmed that ACE2 was indeed the  
36 receptor for the spike protein and viral entry into host cells was further enhanced by priming of the  
37 spike protein by transmembrane protease serine 2 (TMPRSS2) [19]. Our subsequent results confirmed  
38 that our computationally-designed spike antigen when formulated with Advax-SM adjuvant induced  
39 antibodies against spike protein that were able to neutralise wildtype SARS-CoV-2 virus as well as  
40 pseudotyped lentivirus particles and cross neutralised the B.1.1.7 lineage virus. It induced memory  
41 CD4 and CD8 T cell responses with a Th1 phenotype and this translated into CTL killing of spike-labelled  
42 target cells *in vivo*. Notably, the Advax-SM adjuvanted vaccine when used in a ferret SARS-CoV-2  
43 infection model protected against lung but also day 3 nasal virus replication, suggesting a potential  
44 ability to block virus transmission.

45

## 46 **Methods:**

### 47 **Vaccine Design:**

48 In mid-January 2020, we identified the putative spike protein from the SARS-CoV-2 genome sequence  
49 in NCBI (accession number: NC 045512) [20]. Given the homology of the spike proteins (76.4%  
50 sequence identity), SARS-CoV-1 was used as a template to model the SARS-CoV-2 spike protein. We  
51 performed a PSI-BLAST search against the Protein Data Bank (PDB) Database for 3D modelling template  
52 selection. Using the SARS-CoV-1 structure (PDB-ID 6ACC) [21] we performed structural homology  
53 modelling using Modeller9.23 (<https://salilab.org/modeller/>) to obtain a 3D structure of SARS-CoV-2  
54 spike protein (**Figure 1A**). The quality of the spike protein model was evaluated using GA341 and DOPE  
55 score, and the model was assessed using the SWISS-MODEL structure assessment server  
56 (<https://swissmodel.expasy.org/assess>). To help identify the putative cellular receptor for SARS-CoV-2,  
57 the crystal structure of human ACE2 (PDB-ID 3SCI) [22] was retrieved, and using HDock server, the  
58 spike protein was then docked against human ACE2 protein (<http://hdock.phys.hust.edu.cn/>) [23]. The  
59 docking poses were ranked using an energy-based scoring function and the docked structure analysed  
60 using UCSF Chimera. The high binding score predicted human ACE2 as the entry receptor for SARS-  
61 CoV-2 spike protein, confirming spike protein suitability for vaccine design [24]. The docked model was  
62 optimized using AMBER99SB-ILDN force field in Gromacs2020 (<https://www.gromacs.org/>). Molecular  
63 dynamic simulation (MDS) was carried out for 100 ns using a GPU-accelerated version of the program  
64 (**Supplementary video 1**). The structural stability of the complex was monitored by the root-mean-  
65 square deviation (RMSD) value of the backbone atoms of the entire protein. The free energy of binding  
66 was calculated for simulated SARS-CoV-2 Spike and humanACE2 structure using g\_MMPBSA. Finally,  
67 MDS was performed on the spike protein ECD vaccine construct to assess its ability to form a stable  
68 trimer despite the lack of the transmembrane and cytoplasmic domains. The insect cell codon-

69 optimised expression cassette was cloned into pFASTBac1, and baculovirus was generated following  
70 standard Bac-to-Bac procedures. Recombinant baculovirus was expanded in Sf9 cells to P3 and then  
71 used for infection of High Five cells for protein expression. At 72h post infection, the culture  
72 supernatant was clarified by centrifugation, and then the recombinant spike protein ECD was purified  
73 by HisTrap Excel column using the AKTA chromatography system, concentrated by ultrafiltration and  
74 buffer changed to phosphate buffered saline (PBS) then terminally filter sterilised. The sequence of  
75 the recombinant spike protein (rSp) was confirmed by mass spectroscopy, SDS-PAGE gels and Western  
76 blots. Endotoxin was measured using a PyroGene™ Endotoxin Detection System (Cat. No. 50-658U,  
77 LONZA, Walkersville, MD, USA), and residual DNA content in the final vaccine product was also  
78 measured using a Quant-iT™ PicoGreen™ dsDNA Assay Kit (ThermoFisher, P7589) following  
79 manufacturer's instructions.

80

### 81 **Mouse Immunisation Protocol**

82 Female, BALB/c and C57BL/6 (BL6) mice (6-10 weeks old) were supplied by the central animal facility  
83 of Flinders University. Mice were immunised intramuscularly (i.m.) with 1 or 5 µg rSp alone or mixed  
84 with either 1 mg Advax-SM adjuvant or where indicated 50 µg Al(OH)<sub>3</sub> (2% Alhydrogel, Croda  
85 Denmark) in the thigh muscle at weeks 0 and 2. Blood samples were collected by cheek vein bleeding  
86 at 2 weeks after each immunisation. Serum was separated by centrifugation and stored at -20°C prior  
87 to use. Advax-SM (Vaxine, Adelaide, Australia) was a sterile suspension of delta inulin microparticles  
88 at 50 mg/ml with CpG55.2 at 0.5 mg/ml.

89

### 90 **Antigen-specific ELISA for Murine Studies**

91 Spike-specific antibodies were determined by ELISA. Briefly, 1 µg/ml rSp [corresponding to SARS-CoV-  
92 2 (Wuhan) reference sequence Q13 to P1209] or 2 µg/ml receptor-binding domain (RBD)  
93 [corresponding to SARS-CoV-2 (Wuhan) reference sequence R319 to F541] antigen in PBS were used  
94 to coat 96-well ELISA plates. After blocking, 100 µl of diluted serum samples were added followed by  
95 biotinylated anti-mouse IgG (Sigma-Aldrich), IgG1, IgG2a/c, IgG2b, IgG3 and IgM antibodies (all from  
96 Abcam) with horseradish peroxidase(HRP)-conjugated Streptavidin (BD Biosciences) for 1 hour (h).  
97 After washing, 100 µl of TMB substrate (KPL, SeraCare, Gaithersburg, MD, USA) was added and  
98 incubated for 10 min before the reaction was stopped with 100 µl 1M Phosphoric Acid (Sigma-Aldrich).  
99 The optical density was measured at 450 nm (OD<sub>450</sub> nm) using a VersaMax plate reader and analysed  
100 using SoftMax Pro Software. Average OD<sub>450</sub> nm values obtained from negative control wells were  
101 subtracted.

102

### 103 **High-throughput SARS-CoV-2 Live Virus Neutralisation Assay**

104 A high-content microscopy approach was used to assess the ability of mice sera to inhibit SARS-CoV-  
105 2 viral infection and the resulting cytopathic effect in live permissive cells. Briefly, serum samples were  
106 diluted in cell culture medium (MEM-2% FCS) to create a 2-fold dilution series (e.g. 1:20 to 1:160).  
107 Each dilution was then mixed (in duplicate) with an equal volume of virus solution (B.1.319 or B.1.1.7  
108 strains) at  $8 \times 10^3$  TCID<sub>50</sub>/ml (so that dilution series becomes 1:40-1:320), followed by 1 h incubation at  
109 37°C. Meanwhile, freshly trypsinised VeroE6 cells were and plated in 384-well plates (Corning  
110 #CLS3985) at  $5 \times 10^3$  cells per well in 40  $\mu$ L. After 1 h of virus-serum coincubation, 40  $\mu$ L were added to  
111 the cell-plate for a final well volume of 80  $\mu$ L. Plates were incubated for 72 h until readout (37°C, 5%  
112 CO<sub>2</sub>, >90% relative humidity), which occurred by staining cellular nuclei with NucBlue dye (Invitrogen,  
113 #R37605) and imaging the entire well's area with a high-content fluorescence microscopy system (IN  
114 Cell Analyzer 2500HS, Cytiva Life Sciences). The number of cells per well was determined using InCarta  
115 image analysis software (Cytiva). The percentage of viral neutralisation for each well was calculated  
116 with the formula  $N = (D - (1 - Q)) \times 100 / D$ , where "Q" is the well's nuclear count divided by the average  
117 nuclear count of the untreated control wells (i.e. without virus or serum), and "D" equals 1 minus the  
118 average Q-value for the positive infection control wells (i.e. cells + virus, without serum). Therefore,  
119 the average nuclear counts for the infected and uninfected cell controls are defined as 0% and 100%  
120 neutralisation levels, respectively. The threshold for determining the neutralization endpoint titre of  
121 diluted serum samples mixed with virus was set to  $N \geq 50\%$ .

122

### 123 **SARS-CoV-2 Spike Pseudotyped Neutralisation Assay**

124 A non-replicative SARS-COV-2 Spike pseudotyped lentivirus-based platform was developed to  
125 evaluate neutralisation activity in infected/convalescent sera in a Biosafety Level 2 (BSL2) facility. The  
126 hACE2 open reading frame (Addgene# 1786) was cloned into a 3rd generation lentiviral expression  
127 vector pRRSIN.cPPT.PGK-GFP.WPRE (Addgene# 122053), and clonal HEK 293T cells stably expressing  
128 ACE2 were generated by lentiviral transductions as described previously [25], followed by single cell  
129 sorting into 50% HEK 293T conditioned media (media conditioned from 50% confluent HEK 293T  
130 cultures). Lentiviral particles pseudotyped with SARS-COV2 Spike envelope were produced by co-  
131 transfecting HEK 293T cells with a GFP encoding 3rd generation lentiviral plasmid HRSIN-CSGW (a gift  
132 from Camille Frecha [26]), psPAX2 and plasmid expressing codon optimized but C-terminal truncated  
133 SARS COV2 S protein (pCG1-SARS-2-S Delta18 [27], herein Spike Delta18) courtesy of Professor Stefan  
134 Polhman using polyethylenimine as described previously [25]. Neutralisation activity of donor sera  
135 was measured using a single round transduction of ACE2-HEK 293T with Spike pseudotyped lentiviral  
136 particles. Briefly, virus particles were pre-incubated with serially diluted donor sera for 1 h at 37°C.

137 Virus-serum was then added onto ACE2-HEK 293T cells seeded at 2,500 cells per well in a 384-well  
138 tissue culture plate a day before. Following spinoculation at 1200xg for 1 h at 18°C, the cells were  
139 moved to 37°C for a further 72 h. Entry of pseudotyped particles was assessed by imaging GFP-positive  
140 cells and total cell numbers imaged through live nuclei counter staining using NucBlue (Invitrogen).  
141 Total cell counts and % GFP-positive cells were acquired using the InCell imaging platform followed by  
142 enumeration with InCarta high content image analysis software (Cytiva). Neutralisation was measured  
143 by reduction in % GFP expression relative to control group infected with the virus particles without  
144 any serum treatment.

145

#### 146 **Murine T-cell response**

147 BALB/c and BL6 mice were sacrificed, and individual spleens were collected one to two weeks after  
148 the last immunisation. Single-cell suspension in sterile PBS+3% FCS was prepared using a 70 µm easy  
149 strainer (Greiner Bio-One) with a 5 ml syringe plunger. Isolated spleen cells were pelleted and  
150 incubated in red blood cell (RBC) lysis buffer. For Cytometric Bead Array (CBA) assay, splenocytes were  
151 cultured at  $5 \times 10^5$  cells/well in 96-well plates with 3 µg/ml of rSp antigen [corresponding to SARS-  
152 CoV-2 (Wuhan) reference sequence Q13 to P1209] at 37°C and 5% CO<sub>2</sub>. Two days later, the  
153 supernatants were harvested and cytokine concentrations determined by mouse Th1/Th2/Th17 CBA  
154 (BD) and analysed by FCAP array Software (BD). In addition to CBA assay, enzyme-linked immune  
155 absorbent spot (ELISPOT) assay was performed using mouse Interlukin-2 (IL-2), Interlukin-4 (IL-4) or  
156 Interferon gamma (IFN-γ) ELISPOT set (BD PharMingen) or Interlukin-17 (IL-17) antibodies (BioLegend)  
157 according to the manufacturer's instruction. Briefly, single-cell suspensions were prepared from  
158 spleens of mice and plated in Millipore MultiScreen-HA 96-well filter plates (Millipore) pre-coated with  
159 anti-mouse IL-2, IL-4, IL-17 or IFN-γ antibodies overnight at 4°C and blocked by RPMI-1640 containing  
160 10% FBS. Cells were incubated for 48 h in the presence or absence of rSp protein at 37°C and 5% CO<sub>2</sub>.  
161 Wells were washed and incubated with biotinylated labelled anti-mouse IL-2, IL-4, IL-17 or IFN-γ  
162 antibody at room temperature (RT). After washing, wells were incubated with HRP-conjugated  
163 Streptavidin (BD Biosciences) for 1 h at RT. Wells were extensively washed again and developed with  
164 3-amino-9-ethyl-carbazole (AEC) substrate set (BD Biosciences). After drying, spots were counted on  
165 an ImmunoSpot ELISPOT reader (CTL ImmunoSpot Reader, software version 5.1.36). Finally, a T-cell  
166 proliferation assay was performed by incubating collected mice spleen cells for 7 min at RT with 5 µM  
167 Carboxyfluorescein succinimidyl ester (CFSE) (Life Technologies), staining was quenched with FCS and  
168 splenocytes cultured at  $10^6$  cells/well in 96-well plates for 5 days at 37°C in 5% CO<sub>2</sub> with 3 µg/ml of  
169 rSp antigen. At the end of the incubation, the cells were stained with anti-mouse CD4-PerCP-Cy5.5  
170 and anti-mouse CD8-APC (both from BD) and analysed on a FACSCanto II (BD). T-cell proliferation was

171 expressed as the ratio of divided daughter cells to total T-cells, expressed as a percentage, by analogy  
172 to calculation of a stimulation index in thymidine proliferation assays.

173

#### 174 ***In vivo* CTL assay**

175 Functional CD8<sup>+</sup> T cell response was determined by performing *in vivo* CTL assays, as described earlier  
176 [28]. Briefly, naïve syngeneic target spleen cells were left unpulsed or pulsed for 2 h in humidified CO<sub>2</sub>  
177 incubator at 37°C with 5µM H-2K<sup>b</sup>-restricted Sp<sub>539-546</sub> (VNFNFNGL) synthetic peptide [29] (DGpeptide,  
178 Hangzhou, China). Unpulsed (control) and peptide (antigen)-pulsed spleen cells were labelled with 0.5  
179 µM CFSE (CFSE<sup>low</sup>) and 5 µM CFSE (CFSE<sup>high</sup>), respectively. Then, naïve syngeneic and immunised mice  
180 were adoptively transferred with 4×10<sup>6</sup> cells of a 1:1 mix of control-to-antigen-pulsed target spleen  
181 cells. Eighteen (18) hours later, adoptive transfer recipient mice were euthanized, their splenocytes  
182 isolated and resuspended in PBS for acquisition on a BD FACSCanto-II instrument. To evaluate the  
183 percentage of antigen-specific target cell killing, the ratio of CFSE<sup>high</sup>/CFSE<sup>low</sup> in survivors was  
184 compared to the ratio in transferred naïve control mice.

185

#### 186 **Ferret Immunisation Protocol**

187 Fitch ferrets (*Mustela putorius furo*, spayed female, 6 to 12 months of age), were purchased from  
188 Triple F Farms (Sayre, PA, USA). Ferrets were pair-housed in stainless steel cages (Shor-Line, Kansas  
189 City, KS, USA) containing Sani-Chips laboratory animal bedding (P. J. Murphy Forest Products,  
190 Montville, NJ, USA) and provided Teklad Global Ferret Diet (Harlan Teklad, Madison, WI, USA) and  
191 fresh water ad libitum. Groups (n = 6) were vaccinated at day 0 and boosted at day 14 with Covax-19  
192 vaccine (12.5, 25 or 50 µg) formulated with 15 mg Advax-SM adjuvant. Control ferrets received either  
193 saline only (n=3) or were immunised with influenza recombinant hemagglutinin vaccine (rH7, Protein  
194 Sciences, Meriden, USA) formulated with Advax-SM as a control. Blood was collected on days 0, 14  
195 and 28 post-immunisation and day 10 post-challenge and stored at -20°C prior to use.

196

#### 197 **Ferret Challenges**

198 At day 28, all ferrets were infected intranasally with SARS-CoV-2 virus (1 x 10<sup>5</sup> PFU) and were  
199 monitored daily during the infection for adverse events, including weight loss and elevated  
200 temperature for 10 days. At day 3 post infection, nasal swabs were collected from all animals, and  
201 three animals from each group, except for the Advax-SM only control group, were humanely  
202 euthanized, and lung tissue was collected. Three lobes from the right lung of each animal was formalin  
203 fixed for histopathology. Two lobes from the left side of lung from each animal were snap frozen and

204 homogenised using 1 ml DMEM, and the supernatant was collected and kept frozen at -80° for viral  
205 titres.

206

### 207 **Ferret spike RBD-binding IgG ELISA**

208 Immulon® 4HBX plates (Thermo Fisher Scientific, Waltham, MA, USA) were coated with 100 ng/well  
209 of recombinant SARS-CoV-2 Spike protein RBD [corresponding to SARS-CoV-2 (Wuhan) reference  
210 sequence R319 to F541] in PBS overnight at 4°C in a humidified chamber. Plates were blocked with  
211 blocking buffer made up with 2% bovine serum albumin (BSA) Fraction V (Thermo Fisher Scientific,  
212 Waltham, MA, USA), 1% gelatin from bovine skin (Sigma-Aldrich, St. Louis, MO, USA) and 0.05% PBST  
213 (PBS with 0.05% Tween20) (Thermo Fisher Scientific, Waltham, MA, USA) at 37°C for 90 min. Serum  
214 samples from the ferrets were initially diluted 1:50 and further serially diluted 1:3 in blocking buffer  
215 to generate a 4-point binding curve (1:50, 1:150, 1:450, 1:1350). Subsequently, the plates were  
216 incubated overnight at 4°C in a humidified chamber. The following day, plates were washed 5 times  
217 with 0.05% PBST, and IgG antibodies were detected using horseradish peroxidase (HRP)-conjugated  
218 goat anti-ferret polyclonal IgG detection antibody (Abcam, Cambridge, UK) at a 1:4,000 dilution for a  
219 90 min incubation at 37°C. Plates were washed 5 times with 0.05% PBST prior to colorimetric  
220 development with 100 µL of 0.1% 2,2'-azino-bis(3-ethylbenzothiazoline-6-sulphonic acid) (ABTS,  
221 Bioworld, Dublin, OH, USA) solution with 0.05% H<sub>2</sub>O<sub>2</sub> for 18 min at 37°C. The reaction was terminated  
222 with 50 µL of 1% (w/v) sodium dodecyl sulfate (SDS, VWR International, Radnor, PA, USA). Colorimetric  
223 absorbance at 414 nm was measured using a PowerWaveXS plate reader (Biotek, Winooski, VT, USA).  
224 The dilution curve was plotted, and the area under the curve was calculated and multiplied by 1,000  
225 to give standard units.

### 226 **Determination of Virus Titres in Ferret Nasal Washes**

227 Nasal washes were titrated in quadruplicates in Vero E6 cells. Briefly, confluent VeroE6 cells were  
228 inoculated with 2-fold serial dilutions of sample in DMEM containing 2% FBS, supplemented with 1%  
229 penicillin-streptomycin (10,000 IU/ml). At 3 days post infection (dpi), virus positivity was assessed by  
230 reading out cytopathic effects. Infectious virus titres (TCID<sub>50</sub>/ml) were calculated from four replicates  
231 of each nasal wash using the Reed–Muench method.

232

### 233 **Haematoxylin & Eosin (H&E) and Immunohistochemistry Staining of Ferret Lungs**

234 To assess the viral replication and pathological effect of infection, ferrets (n=3) were euthanised 3  
235 days post infection. The right lung lobes were taken for viral plaques, the incision was tied with surgical  
236 suture, and the lung was inflated with 10 ml formalin. Lungs were removed and placed into formalin  
237 for 1 week prior to paraffin embedding. Ferret lungs were embedded into paraffin and were cut using



238 a Leica microtome. Transverse 5  $\mu$ m sections were placed onto Apex superior adhesive glass slides  
239 (Leica biosystem Inc, IL, USA), which were coated for a positive charge, and were processed for H&E  
240 staining. Briefly, sections were deparaffinised in xylene and hydrated using different concentrations  
241 of ethanol (100%, 95%, 80% and 75%) for 2 min each. Deparaffinised and hydrated lung sections were  
242 stained with hematoxylin (Millipore sigma, MA, USA) for 8 min at RT, differentiated in 1% acid alcohol  
243 for 10 sec, and then counterstained with eosin (Millipore sigma, MA, USA) for 30 sec. Slides were then  
244 dehydrated with 95% and 100% ethanol, cleared by xylene, and mounted using Permount® mounting  
245 media (Thermo Fisher scientific, MA, USA). Lung lesions were scored by a board-certified veterinary  
246 pathologist blinded to the study groups as follows: Alveolar (ALV) score: 1 = focal, 2 = multifocal, 3 =  
247 multifocal to coalescing, 4 = majority of section infiltrated by leukocytes; Perivascular cuffing (PVC)  
248 score: 1 = 1 layer of leukocytes surrounding blood vessel, 2 = 2-5 layers, 3 = 6 – 10 layers, 4 = greater  
249 than 10 cells thick; Interstitial Pneumonia (IP) score: 1 = alveolar septa thickened by 1 leukocyte, 2 =  
250 2 leukocytes thick, 3 = 3 leukocytes, 4 = 4 leukocytes.

251

252 For lung immunohistochemistry, the deparaffinised and hydrated lung tissue sections were subjected  
253 to antigen retrieval by sub-boiling in 10 nM sodium citrate buffer at pH6 for 10 min and then incubated  
254 in 3% fresh-made hydrogen peroxide for 10 min to inactivate endogenous peroxidase at RT. The lung  
255 sections were blocked with 5% horse serum in PBS for 1 h at RT, incubated with SARS-CoV-2  
256 Nucleoprotein polyclonal antibody at 1:500 dilution (Invitrogen, Carlsbad, CA, USA) overnight at 4°C,  
257 and then incubated with biotinylated goat-antibody Rabbit IgG H&L (Abcam, Waltham, MA, USA) at  
258 1:1000 dilution for 1 h at RT. The avidin-biotin-peroxidase complex (VectStain Standard ABC kit, Vector  
259 Laboratories, Burlingame, CA, USA) was used to localise the biotinylated antibody, and DAB (Vector  
260 Laboratories, CA, USA) was utilised for colour development. Sections were then counterstained with  
261 hematoxylin, and then mounted using Permount® mounting media (Thermo Fisher Scientific,  
262 Waltham, MA, USA). Images were obtained by Aperio digital slide scanner AT2 (Leica biosystem,  
263 Buffalo Grove, IL, USA).

264

### 265 **Statistical analysis**

266 GraphPad Prism 8.3.1 for Windows was used for drawing graphs and statistical analysis (GraphPad  
267 Software, San Diego, CA, USA). The differences of antibody levels were evaluated by the Mann-  
268 Whitney test, and other differences between groups were evaluated by two-tailed Student's t-test.  
269 ANOVAs with Dunnett's test was used for weight loss with a statistical significance defined as a p-  
270 value of less than 0.05. Limit of detection for viral plaque titres was 50 pfu/ml for statistical analysis.  
271 Limit of detection for neutralisation is 1:10, but 1:5 was used for statistical analysis. Geometric mean

272 titres were calculated for neutralisation assays. For all comparisons,  $p < 0.05$  was considered to  
273 represent a significant difference. In figures \* =  $p < 0.05$ ; \*\* =  $p < 0.01$ ; and \*\*\* =  $p < 0.001$ . All error  
274 bars on the graphs represent standard mean error.

275

## 276 **Ethics statement**

277 The mouse studies were performed at Flinders University, Australia. The protocol was approved by  
278 the Animal Welfare Committee of Flinders University and carried out in strict accordance with the  
279 Australian Code of Practice for the Care and Use of Animals for Scientific Purposes (2013). All efforts  
280 were made to minimise animal suffering. Animals were housed in cages provisioned with water and  
281 standard food and monitored daily for health and condition. After final monitoring, all of the surviving  
282 animals were humanely euthanised. Ferret studies were performed at The University of Georgia,  
283 United States. The University of Georgia Institutional Animal Care and Use Committee approved all  
284 ferret experiments, which were conducted in accordance with the National Research Council's Guide  
285 for the Care and Use of Laboratory Animals, The Animal Welfare Act, and the CDC/NIH's Biosafety in  
286 Microbiological and Biomedical Laboratories guide.

287

288

## 289 **RESULTS**

### 290 **COVAX-19 Vaccine Design and Production**

291 Based on the high binding score (-57.6 kcal/mol) seen from docking our 3D-model of spike protein to  
292 several putative receptors, we predicted ACE2 as the human entry receptor for SARS-CoV-2 (**Figure**  
293 **1B**) [24]. This was soon confirmed by other groups using *in vitro* assays [19]. Based on this spike protein  
294 model, we sought to design a stable soluble secreted spike protein trimer for use as our vaccine  
295 immunogen. We designed a synthetic gene comprising the spike protein extracellular domain (ECD)  
296 together with N-terminal honeybee melittin signal sequence (HBMss) to ensure protein secretion and  
297 attached a hexa-histidine tag at the C-terminal end to assist with protein purification (**Figure 1A**).  
298 Molecular dynamic simulation performed on the spike protein ECD vaccine construct confirmed its  
299 ability to form a stable trimer despite the lack of the transmembrane and cytoplasmic domains and  
300 the absence of any large trimerisation domain tag as used by others (**Figure 1C**). The spike ECD gene  
301 construct was constituted into a baculovirus backbone, and the subsequent virus then used to  
302 transfect two insect cell lines (SF9 and Tni). While both cell lines successfully secreted the protein  
303 construct, higher protein expression was obtained in the Tni cells and these were used for subsequent  
304 production of a recombinant spike protein which was purified using a nickel affinity column and sterile

305 filtration. The final protein product had a purity of ~ 90% by SDS-PAGE (**Figure 1D & E**) and was sterile  
306 with a low endotoxin and residual DNA content (data not shown).

307

### 308 **COVAX-19 vaccine induces spike protein RBD-binding and neutralising antibodies in mice**

309 The serum anti-spike protein response of BL6 mice immunised with rSp alone was dominated by IgG1,  
310 a T helper 2 (Th2) isotype, whilst in Advax-SM adjuvanted groups the response was characterised by  
311 a switch to more IgG2b/c and IgG3 against spike (**Figure 2B**). Overall, Advax-SM adjuvant was  
312 associated with a much higher anti-spike IgG2/IgG1 ratio consistent with a Th1-biased response  
313 (**Figure 2C**). To provide an adjuvant comparison, we set up an additional study to compare the effects  
314 of the Advax-SM adjuvant to a traditional aluminium hydroxide adjuvant (Alhydrogel). As expected,  
315 the Alhydrogel adjuvant exacerbated the IgG1 (Th2) bias seen with rSp alone, thereby contrasting with  
316 the IgG2/3 (Th1) bias of the Advax-SM adjuvant. Most strikingly, mice immunised with Advax-SM  
317 adjuvanted rSp demonstrated high levels of *in vivo* cytotoxic T lymphocyte (CTL) killing of spike-  
318 labelled target cells, whereas mice immunised with rSp alone or formulated with Alhydrogel  
319 demonstrated minimal CTL activity against spike-labelled targets consistent with their Th2 immune  
320 bias (**Supplementary Figure 1**).

321 Spike RBD-binding antibodies have been reported to correlate with SARS-CoV-2 virus neutralisation  
322 [30]. There was a high correlation for each IgG subclass between the level of spike and RBD binding  
323 antibodies by ELISA, suggesting a significant proportion of spike antibodies induced by our rSp antigen  
324 were directed against the RBD region. RBD-binding IgG was almost undetectable in mice immunised  
325 with rSp alone, although these mice did exhibit some RBD-binding IgM. Notably, the Advax-SM  
326 adjuvant increased the spike IgG response but particularly favoured production of RBD-binding  
327 antibodies when expressed as a ratio of the total spike IgG response (**Figure 2C**).

328 BALB/c mice, which have an overall Th2 bias, exclusively made IgG1 when immunised with rSp alone.  
329 Similar to what was seen in BL6 mice, in BALB/c mice Advax-SM adjuvanted rSp induced a switch from  
330 anti-spike IgG1 to IgG2b/c and IgG3 production. The increased IgG2b/c and IgG3 induced by the Advax-  
331 SM adjuvant was equivalent to the reduction in IgG1. Interestingly, BALB/c mice had a low ratio of  
332 RBD to spike IgG, with IgM the dominant RBD-binding antibody rather than IgG. This contrasted with  
333 the high RBD to spike IgG ratio seen in the BL6 mice (**Supplementary Figure 2**).

334 To determine whether the spike antibodies induced by our vaccine could neutralise virus infectivity,  
335 immune sera were tested in both a pseudotyped lentivirus assay (pseudovirus assay) and a SARS-CoV-  
336 2 neutralisation assay (live virus assay). BL6 mice immunised with rSp 1 µg with Advax-SM adjuvant  
337 showed significantly higher pseudovirus neutralisation titers (GMT 320) compared to BL6 mice

338 immunised with an equivalent dose of spike protein alone (GMT 140) (**Figure 3A**) whereas BALB/c  
339 mice immunised with 1 µg rSp showed similar levels of pseudovirus neutralisation regardless of the  
340 presence of adjuvant.

341

342 Both BL6 and BALB/c mice immunised with Advax-SM adjuvanted rSp produced antibodies able to  
343 neutralise live SARS-CoV-2 virus. In BL6 mice, the highest neutralising antibodies were seen after  
344 immunisation with rSp 5µg+Advax-SM (GMT 3,712), then rSp 1 µg with Advax-SM (GMT 1088) and  
345 then rSp alone (GMT 736) (**Figure 3B**). The same trends were seen in BALB/c mice with highest  
346 response for rSp 5µg+Advax-SM (GMT 4,352), then rSp 1 µg with Advax-SM (GMT 960) and finally rSp  
347 alone (GMT 512). To evaluate potential cross-protection against a variant strain, sera were also tested  
348 for ability to neutralise live SARS-CoV-2 “Alpha” variant of concern (lineage B.1.1.7, or “UK-strain”).  
349 Only sera from BL6 or BALB/c mice immunised with Advax-SM adjuvanted rSp were able to neutralise  
350 the B.1.1.7 variant virus, with no neutralisation activity seen in mice immunised with rSp alone (**Figure**  
351 **3C**).

352

353 We next asked whether there was any correlation between total spike or RBD antibody levels and  
354 pseudotype or live virus neutralisation titres. In BL6 mice, there was a positive correlation between  
355 spike and RBD binding IgG and pseudotype and live virus neutralisation titres, with the highest  
356 correlation between spike IgG and pseudotype neutralisation ( $r^2 = 0.49$ ,  $p < 0.0035$ ), followed by RBD  
357 IgG and pseudotype neutralisation ( $r^2 = 0.38$ ,  $p < 0.015$ ) (**Supplementary Figure 3A**). Interestingly, there  
358 were only weak non-significant correlations between spike IgG and live virus neutralisation titres ( $r^2 =$   
359  $0.20$ ,  $p < 0.09$ ) or RBD IgG ( $r^2 = 0.22$ ,  $p < 0.07$ ).

360

361 In BALB/c mice, there was a positive correlation for spike IgG with pseudotype neutralisation titres  
362 ( $r^2 = 0.46$ ,  $p < 0.005$ ) (**Supplementary Figure 3B**). There was also a positive correlation for spike IgM  
363 with both pseudotype ( $r^2 = 0.42$ ,  $p < 0.009$ ) and live virus ( $r^2 = 0.4$ ,  $p < 0.01$ ) neutralisation. However, there  
364 was no correlation between RBD IgM and either pseudotype or live virus neutralisation, suggesting  
365 that IgM in BALB/c might neutralise SARS-CoV-2 through an RBD-independent mechanism.

366

367 Interestingly, there was only a weak correlation between pseudotype and live virus neutralisation ( $r^2$   
368  $= 0.17$ ,  $p < 0.02$ ) (**Supplementary Figure 4**). This could reflect that pseudotype neutralisation assays are  
369 unique at two levels, they utilise greater numbers of viral particles to enable cellular transduction and  
370 GFP expression, and only measure the consequence of a single round of spike-driven cellular fusion.  
371 By contrast, the live virus neutralisation assay measures inhibition of viral entry and productive

372 infection over a 3-day period with repeated rounds of viral replication. Hence, each assay measures  
373 different but important parameters of viral infection, providing clues as to the ability of immune sera  
374 to neutralize first-round viral entry vs. a replicative infection

375

#### 376 **Vaccine-induced T cell responses in mice**

377 Cytokine production was measured in culture supernatants of rSp-stimulated splenocytes obtained  
378 from immunised mice. In BL6 mice, rSp-stimulated IL-2, IFN- $\gamma$  and TNF- $\alpha$  was significantly higher in the  
379 Advax-SM group, consistent with their Th1 bias (**Figure 4A-C**). Similarly, in BALB/c mice, there was  
380 higher rSp-stimulated IFN- $\gamma$  and TNF- $\alpha$  in the Advax-SM group (**Figure 4A-C**). In BALB/c mice, rSp-  
381 stimulated IL-4, IL-6 and IL-10 production was highest in the rSp-alone immunised group, which also  
382 exhibited low IFN- $\gamma$  and TNF production, consistent with a Th2 bias (**Figure 4D-F**). IL-17 was modestly  
383 increased in Advax-SM adjuvanted rSp groups in both BL6 and BALB/c mice (**Figure 4G**). Overall, rSp-  
384 alone groups exhibited a Th2 cytokine bias, while Advax-SM groups exhibited a Th1 bias with an  
385 increased IFN- $\gamma$ /IL-4 ratio (**Figure 4H**). ELISPOT assays on splenocytes from immunised mice confirmed  
386 significantly higher frequencies of IL-2 and IFN- $\gamma$  secreting T cells in response to rSp stimulation in the  
387 Advax-SM groups (**Figure 5A-B**). Anti-spike IL-4-producing T cells were significantly higher in BALB/c  
388 mice, consistent with their Th2 bias (**Figure 5C**). Anti-spike IL-17-producing T-cells were also higher in  
389 the Advax-SM group in BL6 mice (**Figure 5D**).

390

391 Spike-specific CD4<sup>+</sup> and CD8<sup>+</sup> T cell memory cell population were further assessed using a CFSE-dye  
392 dilution proliferation in response to rSp stimulation. Notably, anti-spike CD8 T cell responses were  
393 markedly increased in both BALB/c and BL6 mice that had received Advax-SM adjuvanted rSp (**Figure**  
394 **6**), consistent with the high levels of anti-spike CTL activity also seen in mice receiving this formulation  
395 (**Supplementary Figure 1**). There was also a clear trend to higher anti-spike CD4 T cell responses in  
396 mice that had received Advax-SM adjuvanted rSp, although this difference only reached significance  
397 in the Balb/c group (**Figure 6**).

398

#### 399 **Vaccine protection in ferrets**

400 Having confirmed that the formulation of rSp with Advax-SM adjuvant gave optimal immunogenicity  
401 whether measured by neutralising antibody, T cell cytokines or CTL responses in mice, we next moved  
402 to test the efficacy of this optimised formulation in a ferret infection challenge model. Ferrets were  
403 given two immunisations 2 weeks apart with either of three dose levels of rSp protein (50, 25, or 12.5  
404  $\mu$ g) all formulated with the same dose of Advax-SM adjuvant, with control groups receiving two doses  
405 of an irrelevant influenza vaccine with the same dose of Advax-SM adjuvant (adjuvant control), two

406 doses of saline (saline control) or just a single dose of rSp 50 µg + Advax-SM (single dose control)  
407 **(Figure 7A).**

408 Sera was obtained 2 weeks after the first and second immunisation and measured for IgG to RBD.  
409 Anti-RBD IgG was detectable even 2 weeks after the first dose in all rSp-immunised groups and levels  
410 were further increased 2 weeks after the second dose in those animals that received the second rSp  
411 dose **(Figure 7B)**. Control groups had negligible RBD titres at all time points. Two weeks after the  
412 second dose there was no significant effect of rSp dose seen on RBD titers between similar for the  
413 animals that had received wither the 50, 25, or 12.5 µg doses.

414 In response to the nasal virus challenge the ferrets showed minimal clinical signs of SARS-CoV-2  
415 infection **(Supplementary Figure 5A)**. At 3 days post infection, lungs were harvested from three  
416 ferrets per group and scored for cellular infiltration and injury. Mock-vaccinated ferrets demonstrated  
417 a trend towards higher interstitial pneumonia based on H&E staining, and viral antigen was detectable  
418 in lung cells by immunohistochemistry **(Supplementary Figure 5B and Figure 7Cxi)**. Ferrets that  
419 received just a single vaccine dose similarly showed a trend toward higher interstitial pneumonia in  
420 the H&E staining and positive virus staining **(Supplementary Figure 5B and 7Cxi)**. By comparison, all  
421 groups that received two doses of rSp with Advax-SM had negative SARS-CoV-2 virus staining in the  
422 lungs consistent with protection **(Figure 7Cviii-x)**.

423 Next virus load was assessed in day 3 post-challenge nasal washes. Ferrets that received two  
424 immunisations of rSp at 25 µg or 50 µg with Advax-SM adjuvant had no detectable nasal virus as  
425 measured by TCID<sub>20</sub> assay. Similarly, only 5 out of 6 (84%) of the ferrets that received two  
426 immunisations at the lowest 12.5 µg rSp dose had no detectable virus in their nasal washes, day 3  
427 post-challenge. By contrast, 50% of ferrets in the control and single dose groups had detectable virus  
428 in their nasal washes, day 3 post-challenge.

429

## 430 **DISCUSSION**

431 Vaccines normally take 10-15 years from discovery to final market approval [31]. To accelerate our  
432 COVID-19 vaccine development we made use of a well-validated protein manufacturing platform  
433 complemented by *in silico* modelling analyses. In this way, as soon as the SARS-CoV-2 genome  
434 sequence became available in Jan 2020 [20], we were able to identify the putative spike protein,  
435 model its structure and use docking programs to predict human ACE2 as the main receptor for the  
436 virus, as then confirmed by others [24]. This facilitated our rapid design of a recombinant spike protein  
437 antigen able to be produced as a soluble secreted protein in insect cells to which Advax-SM adjuvant  
438 was then added to produce the final vaccine formulation, which we named Covax-19.

439 We first evaluated the immunogenicity of the vaccine in BL6 and BALB/c mice, confirming Covax-19  
440 vaccine was effective in inducing IgG and IgM antibodies against the spike protein with potent virus  
441 neutralisation activity whether measured by pseudotype or wildtype virus neutralisation assays.  
442 Notably sera from Covax-19 immunised mice were able to cross-neutralise the B.1.1.7 virus variant.  
443 In mice, the Advax-SM adjuvated rSp vaccine induced a strong Th1 response characterised by a switch  
444 from IgG1 to IgG2 and IgG3 IgG isotypes together with an increased frequency of IL-2, IFN- $\gamma$  and TNF-  
445  $\alpha$  secreting anti-spike T cells, and a high level of CTL killing of spike-labelled target cells, *in vivo*. By  
446 contrast, immunisation with rSp alone (or formulated with Alhydrogel adjuvant) induced a  
447 predominantly Th2 antibody and T cell response against spike protein, with lower levels of neutralising  
448 antibody against the wildtype virus and no neutralising activity against the B.1.1.7 virus variant and  
449 no *in vivo* CTL activity against spike-labelled targets. Overall, this demonstrated that our insect cell  
450 expressed spike ECD construct when formulated with Advax-SM adjuvant is an effective immunogen  
451 against SARS-CoV-2.

452

453 SARS-CoV-1 and SARS-CoV-2 viruses target interferon pathways [32, 33]. Hence, coronavirus vaccines  
454 should ideally prime a strong memory Th1 and interferon response with CD8+ T cells playing a critical  
455 role in detection and silencing of virus-infected cells [34]. Immunisation with Advax-SM adjuvanted  
456 rSp induced a high frequency of spike-specific memory CD4+ and CD8+ T cells, which were not seen in  
457 mice immunised with rSp alone. This suggests that the Advax-SM adjuvant was able to induce effective  
458 dendritic cell cross-presentation of spike protein to CD8 T cells, with CD8 T cell priming to exogenous  
459 antigens typically requiring activation of CD8+ dendritic cells [35]. Notably, this CD8 T cell cross-  
460 presentation was associated with significant *in vivo* CTL activity against spike-labelled targets  
461 suggesting that our vaccine should be able to robustly control infection, not just through induction of  
462 neutralising antibody but also through induction of CTLs able to efficiently identify and kill any  
463 residual virus-infected cells in the body. It has been difficult to identify non-reactogenic adjuvants that  
464 induce strong CD8+ T cell responses, making this a potential key advantage of Advax-SM when used  
465 in viral vaccines where strong CD8+ T cell responses are likely to be important to protection.

466

467 Whereas other adjuvant platforms might provide some nonspecific antiviral protection via activation  
468 of the innate immune system, this has not been a feature of the Advax-SM adjuvant. Notably, there  
469 was no suggestion of reduced disease in the challenged ferrets here that were injected with Advax-  
470 SM adjuvant plus an irrelevant influenza vaccine. Similarly, in a past SARS CoV vaccine study we did  
471 not see any nonspecific protection in mice injected with Advax-CpG alone [14], nor did we see  
472 nonspecific protection of Advax and CpG alone in a ferret studies of H5N1 influenza [36]. Hence, this

473 data all supports the enhanced protection of Advax-SM adjuvanted vaccine being solely mediated by  
474 its ability to enhance the adaptive immune response to the co-administered antigen.

475

476 The role of RBD-binding and neutralising antibodies in SARS-CoV-2 protection remains unclear.  
477 Initially, there were concerns of the possibility of antibody-mediated disease enhancement (ADE), as  
478 seen in SARS, dengue, Respiratory Syncytial Virus and other viral diseases [37]. Reassuringly to date,  
479 there have been no reports of ADE in COVID-19 patients, although those with the most severe COVID-  
480 19 illness often have high RBD and neutralising antibodies [38], suggesting neutralising antibody may  
481 not be enough, by itself, and other mediators like CTLs may also be required to fully control SARS-CoV-  
482 2 infection. Furthermore, a spike protein vaccine using a large Human Immunodeficiency Virus-  
483 derived protein trimerization tag and formulated with MF59 squalene adjuvant was shown to induce  
484 serum neutralising antibody, but provided no protection against nasal virus replication in either the  
485 ferret or hamster challenge models [39]. This suggests, at a minimum, that serum neutralising  
486 antibody is not able to prevent nasal virus replication. Furthermore, convalescent plasma has not  
487 proved effective when administered to severely ill patients but instead can induce immune escape  
488 variants [40]. Hence antibodies by themselves may not be sufficient to prevent or reverse COVID-19  
489 disease. In Phase 2 trials, LY-CoV555, a cocktail of two IgG1 antibodies appeared to accelerate the  
490 decline in viral load over time but ultimately did not demonstrate clinical benefit [41] with other  
491 experimental monoclonal treatments still undergoing human testing [42].

492

493 The gold standard for antibody assessment remains live wildtype virus neutralisation assays, as these  
494 directly measure the ability of antibody to block cellular infection. However, different cell types may  
495 be infected via different mechanisms, so use of different cell lines in these assays could still give  
496 varying results. VeroE6 is frequently used in virus neutralisation assays with viral entry in these cells  
497 primarily endosomal and driven through cathepsin cleavage of the spike protein. In contrast, entry of  
498 SARS-CoV-2 into nasopharyngeal cells is driven through TMPRSS2-mediated cleavage of spike [43].  
499 Whilst primary ciliated or goblet cells from nasopharyngeal tissue might be the most physiologically  
500 relevant cell type to use in neutralisation assays, high-throughput serology screening using air-  
501 interface cultures is not feasible. Whilst pseudotyping assays can be performed outside of a BSL3  
502 facility, they measure only a single round of spike-mediated cellular fusion and, hence, do not mimic  
503 a natural infection where there are multiple rounds of entry and replication. RBD-binding antibody  
504 assays work on the presumption that antibodies that block spike protein from binding to ACE2 should  
505 stop virus infectivity. However, in animal studies vaccines that have been shown to induce anti-RBD



506 IgG titres have not prevented virus replication in the nasal mucosa, suggesting either that such  
507 antibodies fail to prevent virus binding or entry or that they fail to get access to the nasal epithelium.

508

509 How do results compare for these assays? Previous studies on convalescent patients have reported a  
510 positive correlation between spike-specific IgG and both pseudotype virus and live virus  
511 neutralisation. In our study, there was a poor correlation between the pseudovirus and live virus  
512 assays, suggesting they measure different determinants of neutralisation. The live virus assay  
513 measures the ability to block cell infection by a small pool of viral particles across 3 days of culture.  
514 The pseudotype assay uses a large pool of virus particles as a surrogate for a single spike-driven fusion  
515 event. In our study, total spike antibody ELISA predicted pseudotype neutralisation better than the  
516 RBD-binding ELISA. Interestingly, in BALB/c but not BL6 mice, there was a positive correlation between  
517 total anti-rSp IgM (but not anti-RBD IgM) with neutralisation titres. Elite donors with high  
518 neutralisation titres in human convalescent cohorts surprisingly achieved this via anti-viral IgM (S.  
519 Turville, personal communication). There is still no established correlate of COVID-19 protection that  
520 has been confirmed in either animal models or humans. The fact that different assays seem to yield  
521 different results suggests that the identification of a correlate based upon simple antibody protection  
522 may not be straightforward.

523

524 Unless a vaccine is able to induce potent sterilising immunity, some SARS-CoV-2 virus will inevitably  
525 enter cells in the nasal mucosa, where antibodies will not be able to reach it and begin to replicate. In  
526 the face of uncertainty over antibody protection and rapidly waning circulating SARS-CoV-2 antibody  
527 levels, a strong CD8 T cell response with interferon production and CTL activity is likely to be important  
528 for virus control. A large body of clinical data demonstrates that reduced T-cell responses and  
529 production of Th1 cytokines, such as interferon and IL-2, are seen in patients with severe COVID-19  
530 disease [44-47]. Moreover, the mode of action and protection of several SARS-CoV-2 vaccines has  
531 been linked to induction of type I interferon secretion by amplifying T cell memory formation and  
532 promoting B cell differentiation and survival [48]. Notably, our Covax-19 vaccine imparted a strong  
533 Th1 bias and robust T cell responses by virtue of the Advax-SM adjuvant. By contrast, alum and  
534 squalene emulsion adjuvants induce a strong Th-2 bias, which may not be as beneficial for COVID-19  
535 virus control [49]. COVID-19 vaccine with alum adjuvant demonstrated a Th2-biased response with a  
536 low IFN- $\gamma$ /IL-4 ratio [50], and we similarly saw a strong Th2 bias of alum for spike protein in the  
537 current study. Notably, alum- and squalene-adjuvanted COVID-19 vaccines were both ineffective  
538 against nasal virus replication [39]. This contrasts strongly, with the ferret protection data shown here,  
539 where Advax-SM adjuvanted rSp, completely prevented both lung and nasal virus replication, an

540 exciting finding as prevention of nasal virus replication could be the key to prevention of virus  
541 transmission. We are currently do not know the mechanism for the prevention of nasal virus  
542 replication in the ferrets by Advax-SM adjuvanted rSp, with the possibilities that is it due to CTL  
543 induced by the vaccine migrating to the nasal mucosa where they might then rapidly eradicate virus  
544 infected cells, or an ability of the adjuvant to induce neutralising antibodies with different functional  
545 properties that are better able to access the nasal environment and prevent infectivity of the virus, or  
546 both. Future studies will attempt to explore these mechanisms further.

547

548 A limitation of the current study was that ferrets do not exhibit weight loss or other signs of SARS-  
549 CoV-2 clinical infection [51], with no animal models fully reproducing the features of severe SARS-  
550 CoV-2 clinical infection in humans. Ongoing studies are testing our Covax-19 vaccine in other species  
551 including hamsters and non-human primates to see whether the effects of the vaccine on inhibition  
552 of nasal virus replication extends to other species. The current study also only assessed protection  
553 soon after immunisation and it will also be important to assess the durability of vaccine protection.

554

## 555 **Conclusion**

556 The COVID-19 pandemic represents a significant evolving global health crisis. The key to overcoming  
557 the pandemic lies in the development of an effective vaccine against SARS-CoV-2 that ideally prevents  
558 transmission as well as serious disease. Recombinant protein-based approaches to COVID-19 offer  
559 benefits over other technologies including a 40-year record of safety and effectiveness including in  
560 very young infants, together with reliable large scale manufacture and high stability under typical  
561 refrigerated conditions [52]. By contrast, other available technologies, including nucleic acid and  
562 adenoviral vector platforms have a high level of reactogenicity and pose cold chain and other  
563 distribution challenges [53, 54]. This study showed that an Advax-SM adjuvanted rSp vaccine (Covax-  
564 19 vaccine) when administered as two sequential intramuscular doses several weeks apart induces  
565 strong anti-spike antibody and T cell responses in mice and was able to protect ferrets against SARS-  
566 CoV-2 replication in the lung and nose, with the possibility that prevention of nasal replication may  
567 signal an ability to prevent virus transmission. Future clinical trials will be required to assess how this  
568 promising animal data translates into human protection.

569

## 570 **Acknowledgements**

571 The following reagent was deposited by the Centers for Diseases Control and Prevention and  
572 obtained through BEI Resources, NIAID, NIH: SARS-Related Coronavirus 2, Isolate USA-WA1/2020,  
573 NR-52281. The authors would like to thank the University of Georgia Animal Resources staff,

574 technicians, and veterinarians for animal care. We also acknowledge the expert assistance of Johnson  
575 Fung and King Ho Leong with the endotoxin and CTL assays.

576

577 **Competing Interests**

578 YHO, LL, JB, and NP are affiliated with Vaxine Pty Ltd which holds the rights to COVAX-19™ vaccine  
579 and Advax™ and CpG55.2™ adjuvants.

580

581 **Funding Information**

582 This work was supported by a Fast Grant administered by George Mason University, funding from  
583 National Institute of Allergy and Infectious Diseases of the National Institutes of Health under  
584 Contract HHS-N272201400053C, and in part by the University of Georgia (MRA-001). In addition,  
585 TMR is supported by the Georgia Research Alliance as an Eminent Scholar.

586 **References:**

- 587 [1] Hu B, Guo H, Zhou P, Shi Z-L. Characteristics of SARS-CoV-2 and COVID-19. *Nature Reviews*  
588 *Microbiology*. 2020;1-14.
- 589 [2] Weekly Operational Update on COVID-19. 2021.
- 590 [3] Gu J, Korteweg C. Pathology and pathogenesis of severe acute respiratory syndrome. *The American*  
591 *journal of pathology*. 2007;170:1136-47.
- 592 [4] Looi M-K. Covid-19: Is a second wave hitting Europe? *BMJ*. 2020;371.
- 593 [5] Kupferschmidt K. Fast-spreading UK virus variant raises alarms. *Science*. 2021;371:9-10.
- 594 [6] Le TT, Cramer JP, Chen R, Mayhew S. Evolution of the COVID-19 vaccine development landscape.  
595 *Nat Rev Drug Discov*. 2020;19:667-8.
- 596 [7] Le TT, Andreadakis Z, Kumar A, Roman RG, Tollefsen S, Saville M, et al. The COVID-19 vaccine  
597 development landscape. *Nat Rev Drug Discov*. 2020;19:305-6.
- 598 [8] van Riel D, de Wit E. Next-generation vaccine platforms for COVID-19. *Nature Materials*.  
599 2020;19:810-2.
- 600 [9] Coish JM, MacNeil AJ. Out of the frying pan and into the fire? Due diligence warranted for ADE in  
601 COVID-19. *Microbes and Infection*. 2020.
- 602 [10] Kostoff RN, Briggs MB, Porter AL, Spandidos DA, Tsatsakis A. COVID-19 vaccine safety.  
603 *International Journal of Molecular Medicine*. 2020;46:1599-602.
- 604 [11] Perrie Y, Mohammed AR, Kirby DJ, McNeil SE, Bramwell VW. Vaccine adjuvant systems: enhancing  
605 the efficacy of sub-unit protein antigens. *International Journal of Pharmaceutics*. 2008;364:272-80.
- 606 [12] Pashine A, Valiante NM, Ulmer JB. Targeting the innate immune response with improved vaccine  
607 adjuvants. *Nature Medicine*. 2005;11:S63-S8.
- 608 [13] Weinberger B. Adjuvant strategies to improve vaccination of the elderly population. *Current*  
609 *Opinion in Pharmacology*. 2018;41:34-41.
- 610 [14] Honda-Okubo Y, Barnard D, Ong CH, Peng B-H, Tseng C-TK, Petrovsky N. Severe acute respiratory  
611 syndrome-associated coronavirus vaccines formulated with delta inulin adjuvants provide enhanced

- 612 protection while ameliorating lung eosinophilic immunopathology. *Journal of Virology*. 2015;89:2995-  
613 3007.
- 614 [15] Adney DR, Wang L, Van Doremalen N, Shi W, Zhang Y, Kong W-P, et al. Efficacy of an adjuvanted  
615 Middle East respiratory syndrome coronavirus spike protein vaccine in dromedary camels and alpacas.  
616 *Viruses*. 2019;11:212.
- 617 [16] Gordon DL, Sajkov D, Honda-Okubo Y, Wilks SH, Aban M, Barr IG, et al. Human Phase 1 trial of  
618 low-dose inactivated seasonal influenza vaccine formulated with Advax™ delta inulin adjuvant.  
619 *Vaccine*. 2016;34:3780-6.
- 620 [17] Gordon DL, Sajkov D, Woodman RJ, Honda-Okubo Y, Cox MM, Heinzl S, et al. Randomized clinical  
621 trial of immunogenicity and safety of a recombinant H1N1/2009 pandemic influenza vaccine  
622 containing Advax™ polysaccharide adjuvant. *Vaccine*. 2012;30:5407-16.
- 623 [18] Gordon D, Kelley P, Heinzl S, Cooper P, Petrovsky N. Immunogenicity and safety of Advax™, a  
624 novel polysaccharide adjuvant based on delta inulin, when formulated with hepatitis B surface  
625 antigen: a randomized controlled Phase 1 study. *Vaccine*. 2014;32:6469-77.
- 626 [19] Hoffmann M, Kleine-Weber H, Schroeder S, Krüger N, Herrler T, Erichsen S, et al. SARS-CoV-2 cell  
627 entry depends on ACE2 and TMPRSS2 and is blocked by a clinically proven protease inhibitor. *Cell*.  
628 2020.
- 629 [20] Wu F, Zhao S, Yu B, Chen Y-M, Wang W, Song Z-G, et al. A new coronavirus associated with human  
630 respiratory disease in China. *Nature*. 2020;579:265-9.
- 631 [21] Song W, Gui M, Wang X, Xiang Y. Cryo-EM structure of the SARS coronavirus spike glycoprotein  
632 in complex with its host cell receptor ACE2. *PLoS Pathogens*. 2018;14:e1007236.
- 633 [22] Wu K, Peng G, Wilken M, Geraghty RJ, Li F. Mechanisms of host receptor adaptation by severe  
634 acute respiratory syndrome coronavirus. *Journal of Biological Chemistry*. 2012;287:8904-11.
- 635 [23] Yan Y, Tao H, He J, Huang S-Y. The HDock server for integrated protein–protein docking. *Nature*  
636 *Protocols*. 2020;15:1829-52.
- 637 [24] Piplani S, Singh PK, Winkler DA, Petrovsky NJapa. In silico comparison of spike protein-ACE2  
638 binding affinities across species; significance for the possible origin of the SARS-CoV-2 virus. *arXiv*  
639 preprint. 2020;arXiv:2005:06199.

- 640 [25] Aggarwal A, Iemma TL, Shih I, Newsome TP, McAllery S, Cunningham AL, et al. Mobilization of HIV  
641 spread by diaphanous 2 dependent filopodia in infected dendritic cells. *PLoS Pathog.*  
642 2012;8:e1002762.
- 643 [26] Toscano MG, Frecha C, Ortega C, Santamaría M, Martín F, Molina IJ. Efficient lentiviral  
644 transduction of Herpesvirus saimiri immortalized T cells as a model for gene therapy in primary  
645 immunodeficiencies. *Gene Ther.* 2004;11:956-61.
- 646 [27] Hoffmann M, Kleine-Weber H, Schroeder S, Krüger N, Herrler T, Erichsen S, et al. SARS-CoV-2 cell  
647 entry depends on ACE2 and TMPRSS2 and is blocked by a clinically proven protease inhibitor. *cell.*  
648 2020;181:271-80. e8.
- 649 [28] Honda-Okubo Y, Ong CH, Petrovsky N. Advax delta inulin adjuvant overcomes immune immaturity  
650 in neonatal mice thereby allowing single-dose influenza vaccine protection. *Vaccine.* 2015;33:4892-  
651 900.
- 652 [29] Zhi Y, Kobinger GP, Jordan H, Suchma K, Weiss SR, Shen H, et al. Identification of murine CD8 T  
653 cell epitopes in codon-optimized SARS-associated coronavirus spike protein. *Virology.* 2005;335:34-  
654 45.
- 655 [30] Salazar E, Kuchipudi SV, Christensen PA, Eagar T, Yi X, Zhao P, et al. Convalescent plasma anti-  
656 SARS-CoV-2 spike protein ectodomain and receptor-binding domain IgG correlate with virus  
657 neutralization. *The Journal of Clinical Investigation.* 2020;130:6728-38.
- 658 [31] Fedson DS. Vaccine development for an imminent pandemic: why we should worry, what we  
659 must do. *Human Vaccines.* 2006;2:38-42.
- 660 [32] Lei X, Dong X, Ma R, Wang W, Xiao X, Tian Z, et al. Activation and evasion of type I interferon  
661 responses by SARS-CoV-2. *Nature Communications.* 2020;11:1-12.
- 662 [33] Lokugamage KG, Hage A, de Vries M, Valero-Jimenez AM, Schindewolf C, Dittmann M, et al. Type  
663 I interferon susceptibility distinguishes SARS-CoV-2 from SARS-CoV. *Journal of Virology.* 2020.
- 664 [34] Appay V, Douek DC, Price DA. CD8+ T cell efficacy in vaccination and disease. *Nature medicine.*  
665 2008;14:623-8.
- 666 [35] Ho NI, Raaijmakers TK, Adema GJ. Adjuvants enhancing cross-presentation by dendritic cells: the  
667 key to more effective vaccines? *Frontiers in Immunology.* 2018;9:2874.

- 668 [36] Layton RC, Petrovsky N, Gigliotti AP, Pollock Z, Knight J, Donart N, et al. Delta inulin polysaccharide  
669 adjuvant enhances the ability of split-virion H5N1 vaccine to protect against lethal challenge in ferrets.  
670 Vaccine. 2011;29:6242-51.
- 671 [37] Lee WS, Wheatley AK, Kent SJ, DeKosky BJ. Antibody-dependent enhancement and SARS-CoV-2  
672 vaccines and therapies. Nature Microbiology. 2020;5:1185-91.
- 673 [38] Chen X, Pan Z, Yue S, Yu F, Zhang J, Yang Y, et al. Disease severity dictates SARS-CoV-2-specific  
674 neutralizing antibody responses in COVID-19. Signal Transduction Targeted Therapy. 2020;5:1-6.
- 675 [39] Watterson D, Wijesundara D, Modhiran N, Mordant F, Li Z, Avumegah M, et al. Molecular clamp  
676 stabilised Spike protein for protection against SARS-CoV-2.30 September 2020, PREPRINT (Version 1)  
677 available at Research Square [<https://doi.org/10.21203/rs.3.rs-68892/v1>].
- 678 [40] Zeng Q-L, Yu Z-J, Gou J-J, Li G-M, Ma S-H, Zhang G-F, et al. Effect of convalescent plasma therapy  
679 on viral shedding and survival in patients with coronavirus disease 2019. The Journal of Infectious  
680 Diseases. 2020;222:38-43.
- 681 [41] Dyer O. Covid-19: Eli Lilly pauses antibody trial for safety reasons. BMJ. 2020;14:m3985.
- 682 [42] DeFrancesco L. COVID-19 antibodies on trial. Nature Biotechnology. 2020;38:1242-52.
- 683 [43] Sungnak W, Huang N, Bécavin C, Berg M, Queen R, Litvinukova M, et al. SARS-CoV-2 entry factors  
684 are highly expressed in nasal epithelial cells together with innate immune genes. Nature medicine.  
685 2020;26:681-7.
- 686 [44] Chen G, Wu D, Guo W, Cao Y, Huang D, Wang H, et al. Clinical and immunological features of  
687 severe and moderate coronavirus disease 2019. The Journal of clinical investigation. 2020;130:2620-  
688 9.
- 689 [45] Chua RL, Lukassen S, Trump S, Hennig BP, Wendisch D, Pott F, et al. COVID-19 severity correlates  
690 with airway epithelium-immune cell interactions identified by single-cell analysis. Nature  
691 biotechnology. 2020;38:970-9.
- 692 [46] Zheng H-Y, Zhang M, Yang C-X, Zhang N, Wang X-C, Yang X-P, et al. Elevated exhaustion levels and  
693 reduced functional diversity of T cells in peripheral blood may predict severe progression in COVID-19  
694 patients. Cellular & molecular immunology. 2020;17:541-3.

- 695 [47] Lagunas-Rangel FA, Chávez-Valencia V. High IL-6/IFN- $\gamma$  ratio could be associated with severe  
696 disease in COVID-19 patients. *Journal of medical virology*. 2020;92:1789-90.
- 697 [48] Teijaro JR, Farber DL. COVID-19 vaccines: modes of immune activation and future challenges.  
698 *Nature Reviews Immunology*. 2021:1-3.
- 699 [49] Gupta T, Gupta SK. Potential adjuvants for the development of a SARS-CoV-2 vaccine based on  
700 experimental results from similar coronaviruses. *International Immunopharmacology*. 2020:106717.
- 701 [50] Qi X, Ke B, Feng Q, Yang D, Lian Q, Li Z, et al. Construction and immunogenic studies of a mFc  
702 fusion receptor binding domain (RBD) of spike protein as a subunit vaccine against SARS-CoV-2  
703 infection. *Chemical Communications*. 2020;56:8683-6.
- 704 [51] Kim Y-I, Kim S-G, Kim S-M, Kim E-H, Park S-J, Yu K-M, et al. Infection and rapid transmission of  
705 SARS-CoV-2 in ferrets. *Cell Host Microbe*. 2020.
- 706 [52] Calina D, Docea AO, Petrakis D, Egorov AM, Ishmukhametov AA, Gabibov AG, et al. Towards  
707 effective COVID-19 vaccines: Updates, perspectives and challenges. *International Journal of Molecular*  
708 *Medicine*. 2020;46:3-16.
- 709 [53] Rollier CS, Reyes-Sandoval A, Cottingham MG, Ewer K, Hill AV. Viral vectors as vaccine platforms:  
710 deployment in sight. *Current Opinion in Immunology*. 2011;23:377-82.
- 711 [54] Leitner WW, Ying H, Restifo NP. DNA and RNA-based vaccines: principles, progress and prospects.  
712 *Vaccine*. 1999;18:765-77.
- 713
- 714
- 715
- 716
- 717
- 718
- 719
- 720
- 721
- 722
- 723



724

### List of Figure Captions

725 **Figure 1:** Modelling and expression of SARS-CoV-2 spike ectodomain (ECD) vaccine  
726 antigen. (A) Diagram of the ECD construct of SARS-CoV-2 spike (S) protein. Honeybee melittin signal  
727 (HBMss) peptide was used for efficient secretion expression. Transmembrane domain and  
728 intracellular domain were removed and replaced with a TEV cleavage site followed by 6x Histidines  
729 (6xHis). (B) SARS-CoV-2 receptor binding domain (RBD) (green) binding human Angiotensin-  
730 Converting Enzyme 2 (ACE2) (red). (C) Molecular dynamic simulation (MDS) run for 100 ns showed the  
731 structure was stable. (D) Representative Coomassie Brilliant Blue stained SDS-PAGE of purified S-  
732 dTM. (E) Purified S-dTM was confirmed by Western blot using anti-SARS-CoV-2 spike mouse polyclonal  
733 antibody.

734

735 **Figure 2:** Advax-SM adjuvant enhances total Spike and RBD antibodies. (A) Schematic diagram of  
736 immunisation and sample collection. Female C57BL/6 and BALB/c mice were immunised i.m. twice at  
737 2-week intervals with 1 µg rSp or 1 and 5 µg rSp with Advax-SM adjuvant. Blood samples were  
738 collected 2 weeks later and spleens 3-4 weeks after the last immunisation. (B) Shown are ELISA results  
739 (mean + SD) in BL6 mice. Statistical analysis by Mann-Whitney test. \*,  $p < 0.05$ , \*\*,  $p < 0.01$ , ns; not  
740 significant. (C) Overview of IgG2/IgG1 ratio in BL6 and BALB/c mice.

741

742 **Figure 3:** Neutralisation antibody titres from sera of immunised BL6 and BALB/c mice determined by  
743 (A) SARS-CoV-2 Spike pseudotyped lentivirus assay, (B) live SARS-CoV-2 wild type virus (lineage  
744 B.1.319) and (C) live SARS-CoV-2 variant of concern "Alpha" virus (lineage B.1.1.7, or "UK-strain").  
745 Statistical analysis by Mann-Whitney test. \*,  $p < 0.05$ , \*\*,  $p < 0.01$ , ns; not significant.

746

747 **Figure 4:** Co-administration of Advax-SM adjuvant enhances cytokine-producing cells in response to  
748 rSp antigen. Mice were immunised intramuscularly two times at 2 weeks apart with 1 µg rSp antigen  
749 alone or together with Advax-SM adjuvant. (A) Cytokines produced by splenocytes that have been  
750 collected 2 or 3 weeks after the last immunisation then cultured 2 days with rSp antigen were  
751 determined by CBA assay.

752

753 **Figure 5:** Antigen-specific cytokine-producing cells were evaluated following re-stimulation with rSp  
754 of splenocytes using anti-mouse cytokine antibody-coated plates by ELISPOT. Statistical analysis was  
755 done by Mann-Whitney test. \*,  $p < 0.05$ , \*\*,  $p < 0.01$ , \*\*\*,  $p < 0.001$ , ns; not significant.

756

757 **Figure 6:** Antigen-specific proliferation was measured by FACS using CFSE-labelled splenocytes after  
758 culture for 5 days with rSp antigen. Results are presented as mean + SD. Statistical analysis was done  
759 by Mann-Whitney test. \*,  $p < 0.05$ , \*\*,  $p < 0.01$ , \*\*\*,  $p < 0.001$ , ns; not significant.

760

761 **Figure 7:** Ferret SARS-CoV-2 Challenge Model. (A) Overview of Ferret study design. Ferrets ( $n = 6$ ) were  
762 vaccinated at day 0 and boosted at day 14 with SARS-CoV-2 spike protein (12.5, 25 or 50  $\mu\text{g}$ )  
763 formulated with 15 mg Advax-SM adjuvant. Control ferrets either received saline only ( $n=3$ ) or were  
764 immunised with influenza vaccine formulated with Advax-SM as a control ( $n=3$ ). Ferrets were  
765 challenged with SAR-CoV-2 virus ( $1 \times 10^5$  PFU) 14 days after last immunisation. Blood was collected  
766 at day -28, -14. Lungs were collected 3 days post challenge for immunopathology. Lungs and nasal  
767 washes were collected 3 days post challenge for viral titres. (B) ELISA for Ferret anti-RBD IgG  
768 antibodies. (C) Haematoxylin & Eosin (H&E) (i-vi) and anti-SARS-CoV-2 nucleoprotein  
769 immunohistochemistry (IHC) staining (vii-xii) at 40x magnification (scale bar = 50 $\mu\text{m}$ ).

770

771 **Supplementary Figure 1:** Advax-SM adjuvant enhances Cytotoxic T lymphocyte (CTL) activity and  
772 overcomes dominant Th2-bias compared to rSp antigen alone or together with Advax-SM adjuvant.  
773 Female BL6 mice were immunised i.m. twice at 2-week intervals with 1  $\mu\text{g}$  rSp alone or with Advax-  
774 SM or 50  $\mu\text{g}$  Al(OH)<sub>3</sub> adjuvant. Blood samples were collected at 2 weeks and spleens at 4 weeks after  
775 the last immunisation. Shown are CTL functional assay (A) and ELISA (B) results (mean + SD). Statistical  
776 analysis was done by Mann-Whitney test. \*,  $p < 0.05$ , ns; not significant.

777

778 **Supplementary Figure 2:** Co-administration of Advax-SM adjuvant enhances both vaccine-induced  
779 anti-rSp and anti-RBD antibodies in BALB/c mice. Shown are anti-rSp and anti-RBD antibodies  
780 measured by ELISA (mean + SD) in BALB/c mice. Statistical analysis was done by Mann-Whitney test.  
781 \*,  $p < 0.05$ , \*\*,  $p < 0.01$ .

782

783 **Supplementary Figure 3:** Neutralisation antibody titres determined by SARS-CoV-2 (S-CoV-2) Spike  
784 pseudotyped lentivirus-based platform and S-CoV-2 live virus. Correlation of NT titre and ELISA OD  
785 value in BL6 mice (A) and BALB/c mice (B).

786

787 **Supplementary Figure 4:** Correlation of S-CoV-2 and pseudotype neutralisation assays.

788

789 **Supplementary Figure 5:** SARS-CoV-2 disease pathology in immunised and control ferrets post-  
790 challenge. (A) Change in body weight measured over 10 days post infection with  $1 \times 10^5$  PFU SARS-  
791 CoV-2 virus. (B) Lungs ( $n=3$ ) were collected from each group at day 3 post-challenge, and histology

792 sections were assessed by board-certified veterinary pathologist blinded to the groups for lung injury  
793 score and number of lesions.

## Figure 1

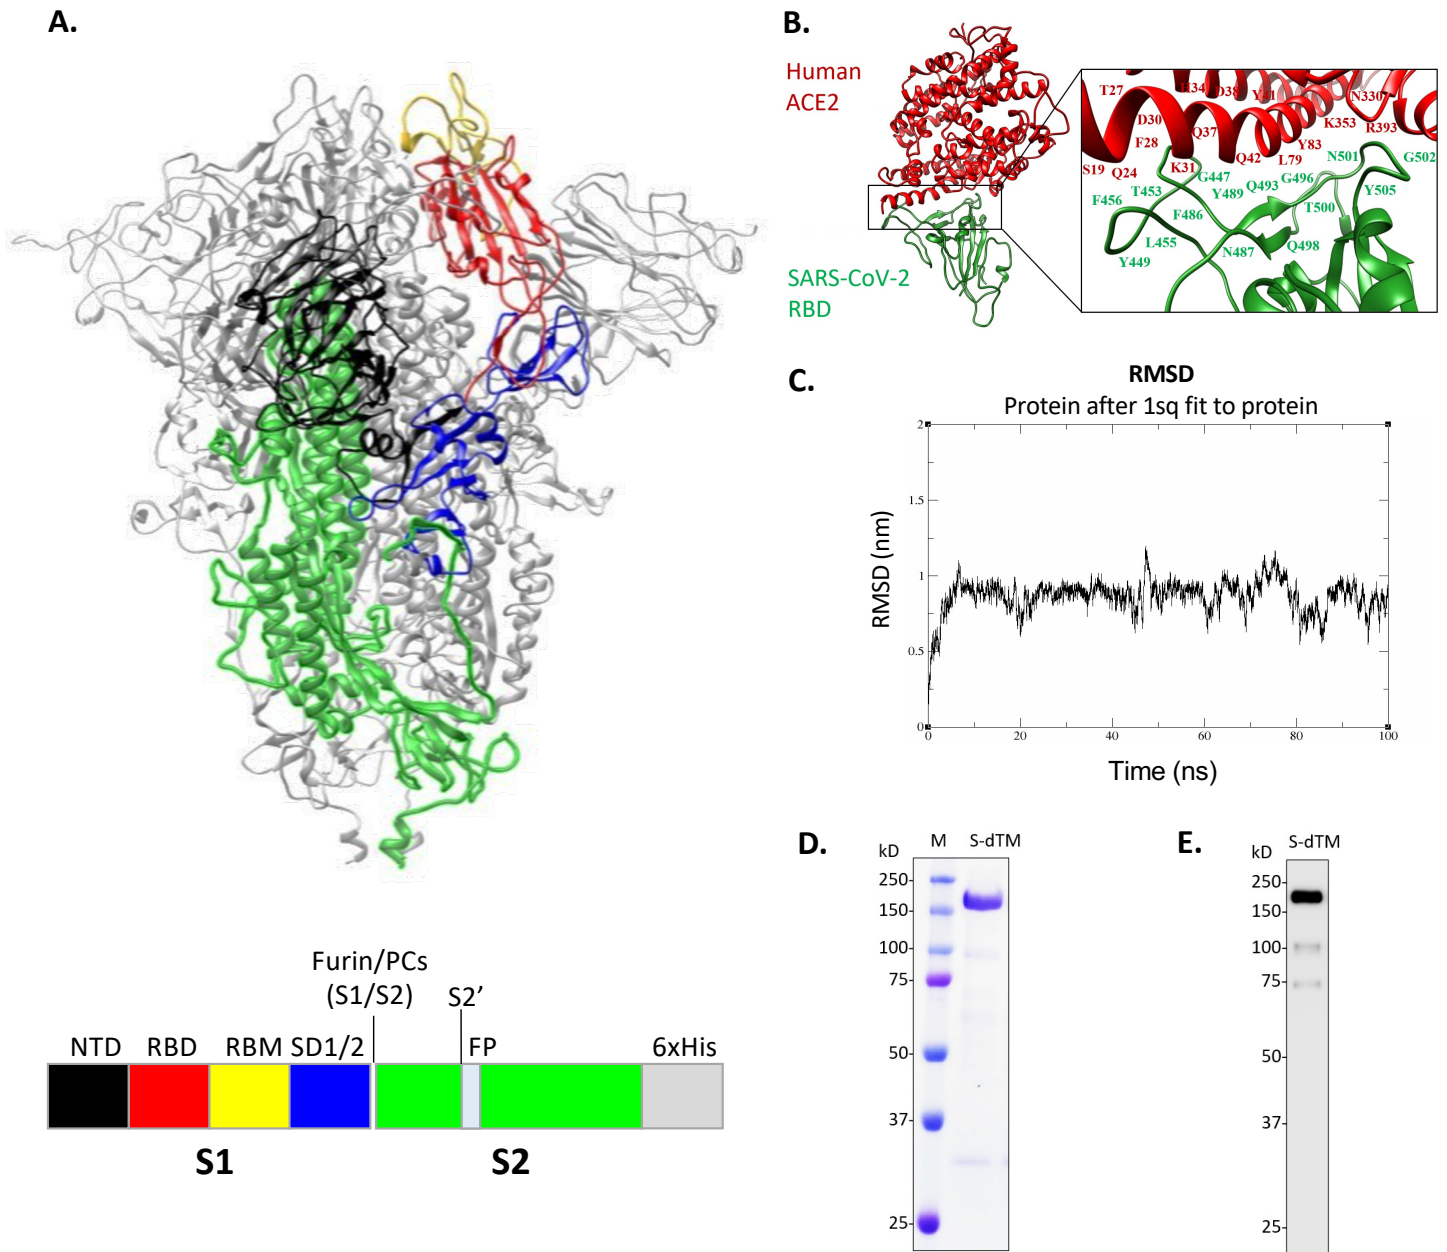

## Figure 2

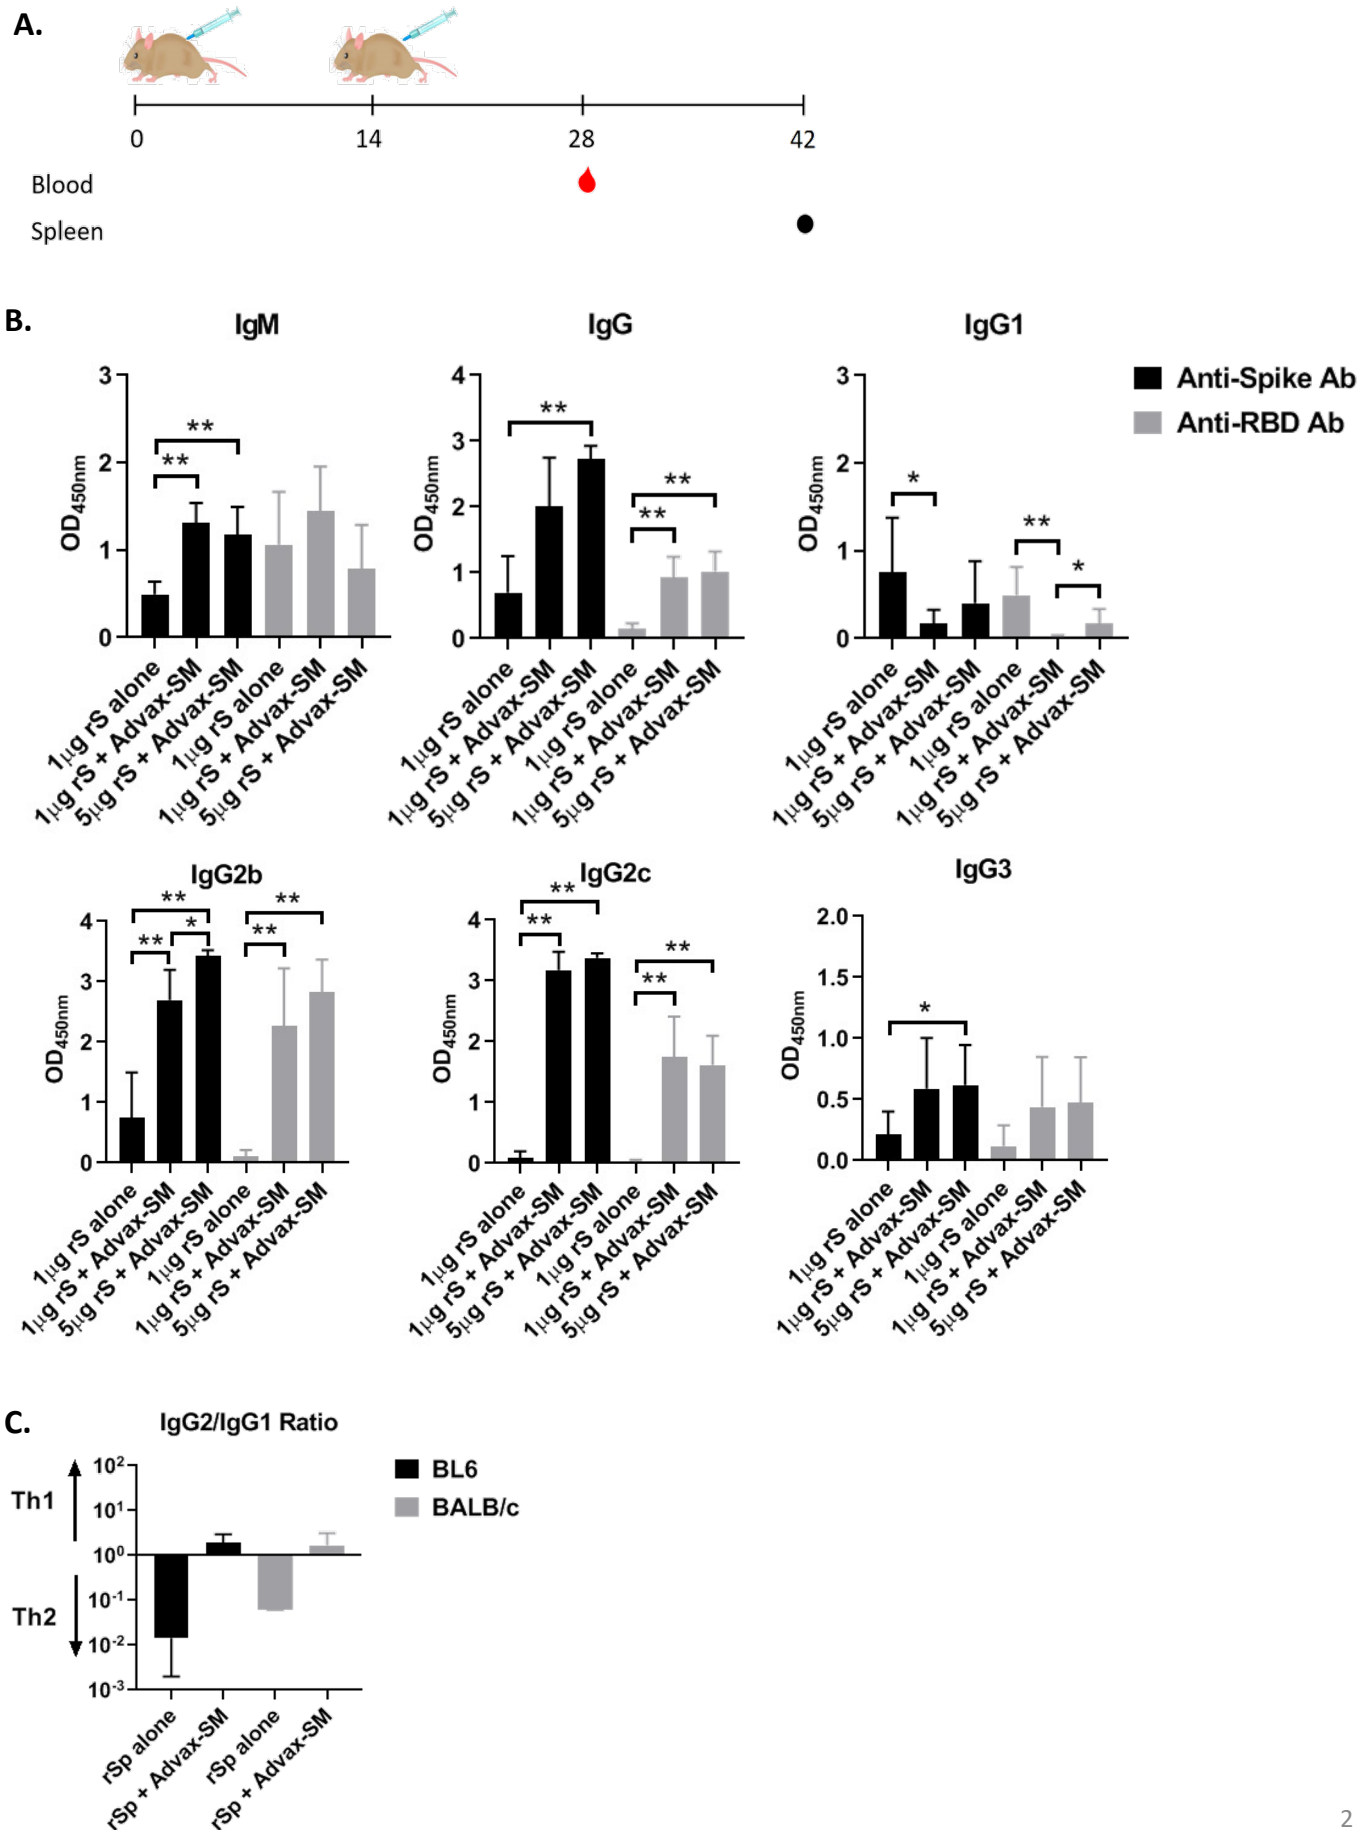

## Figure 3

### A. Neutralisation against SARS-CoV-2 Pseudovirus

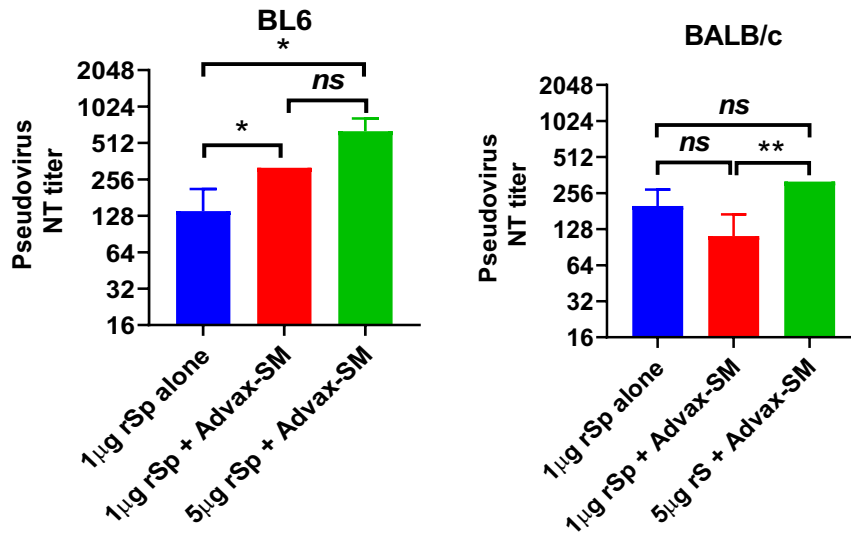

### B. Neutralisation against live SARS-CoV-2 wild type virus (B.1.319)

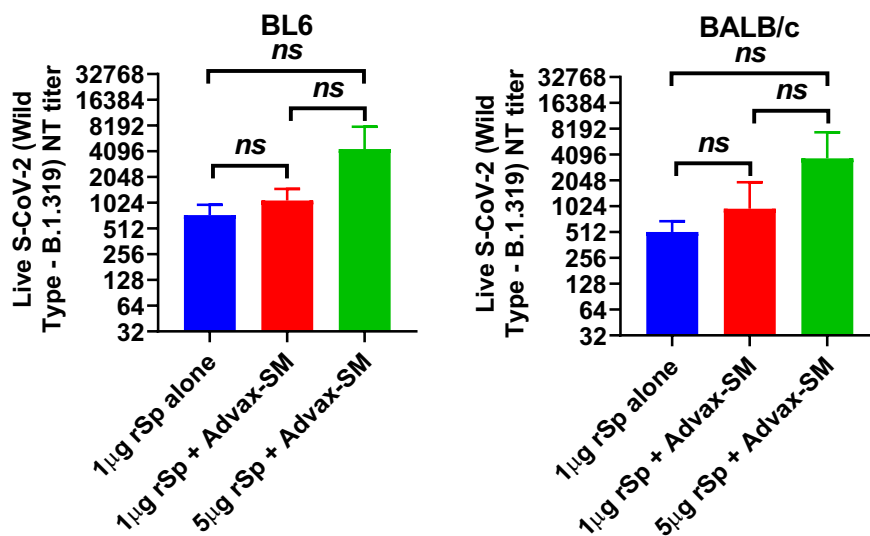

### C. Neutralisation against live SARS-CoV-2 alpha variant virus (lineage B.1.1.7)

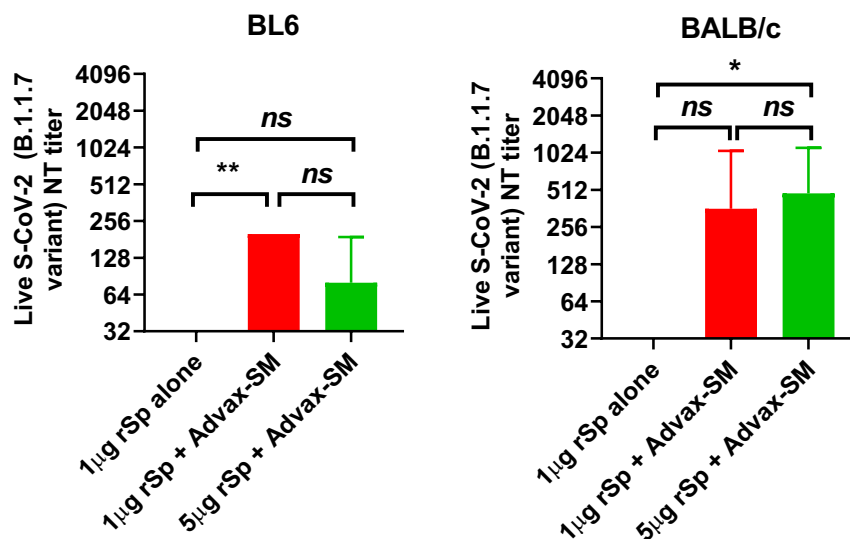

## Figure 4

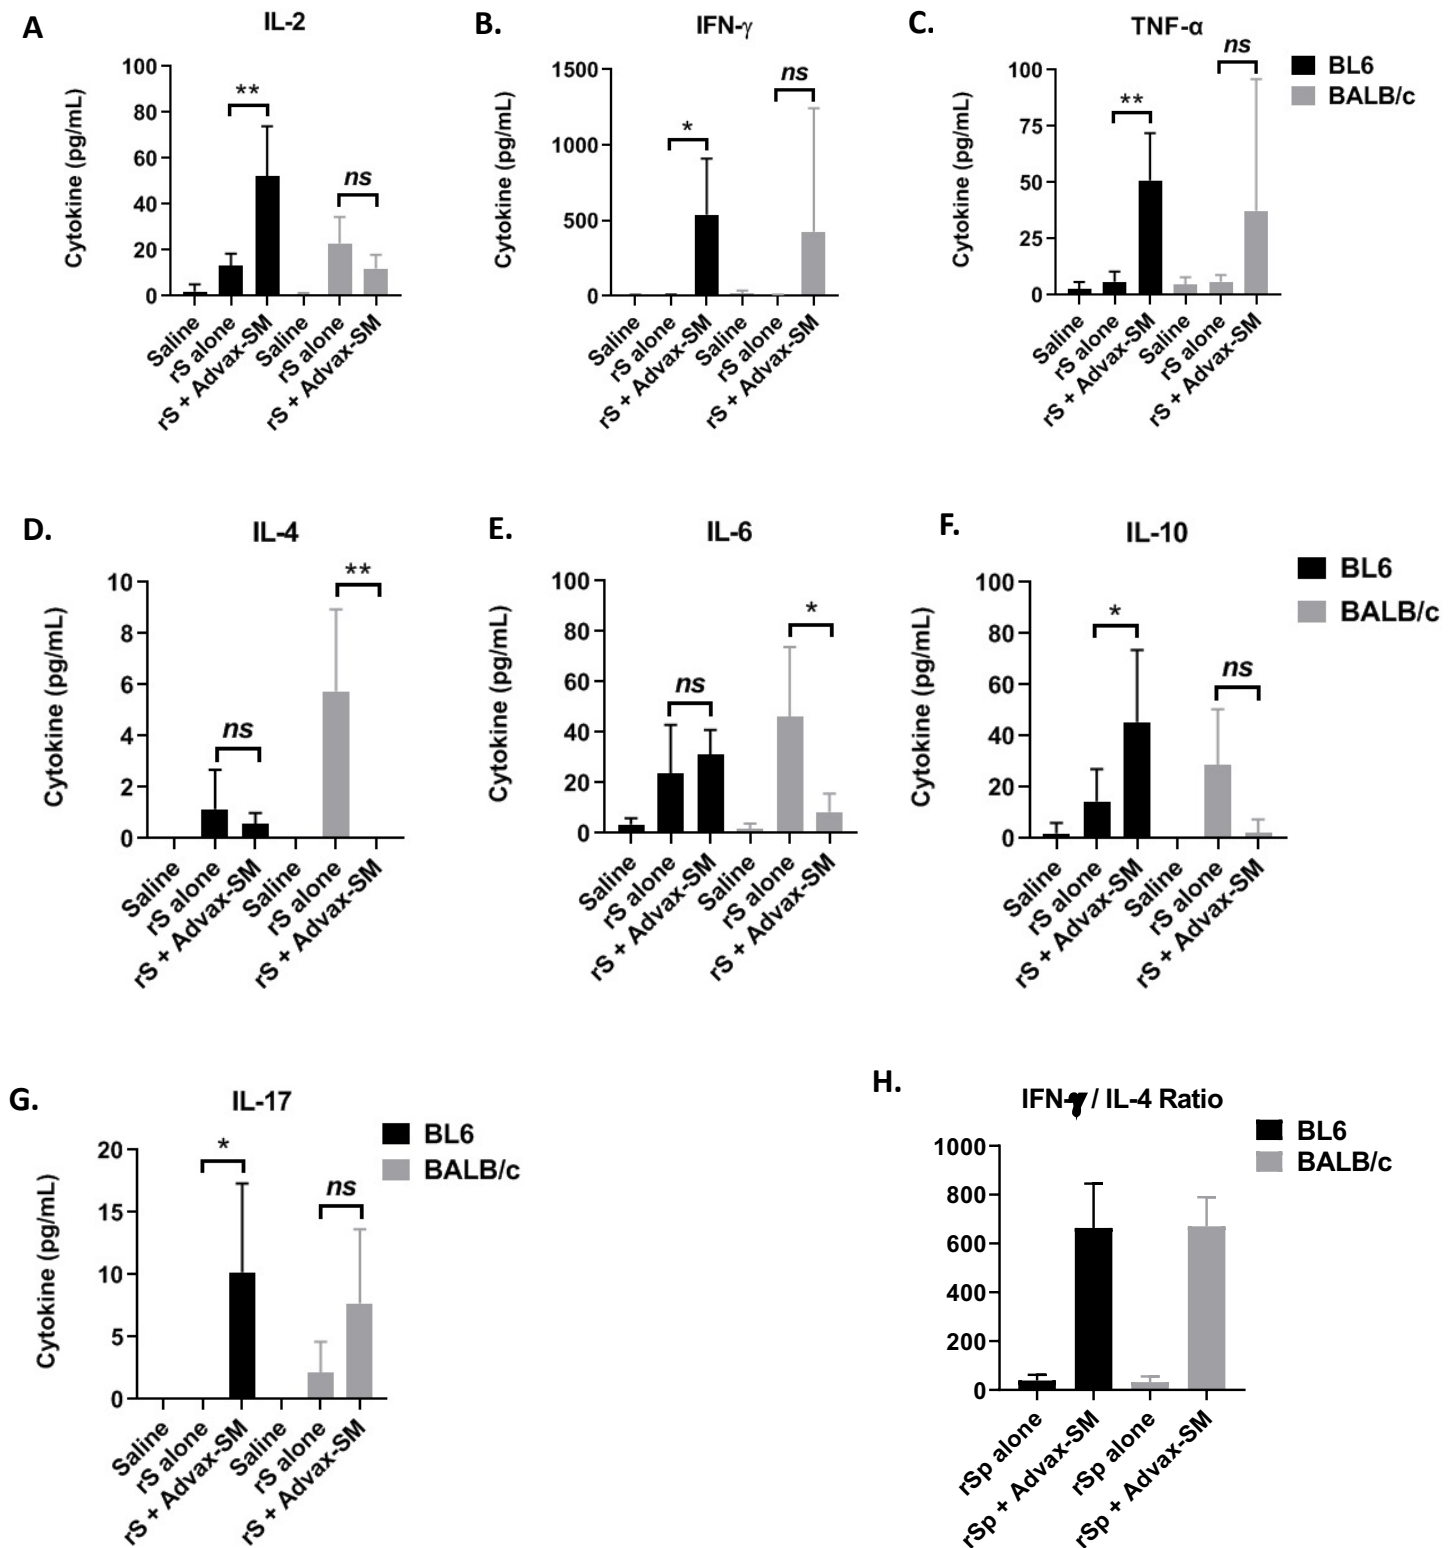

## Figure 5

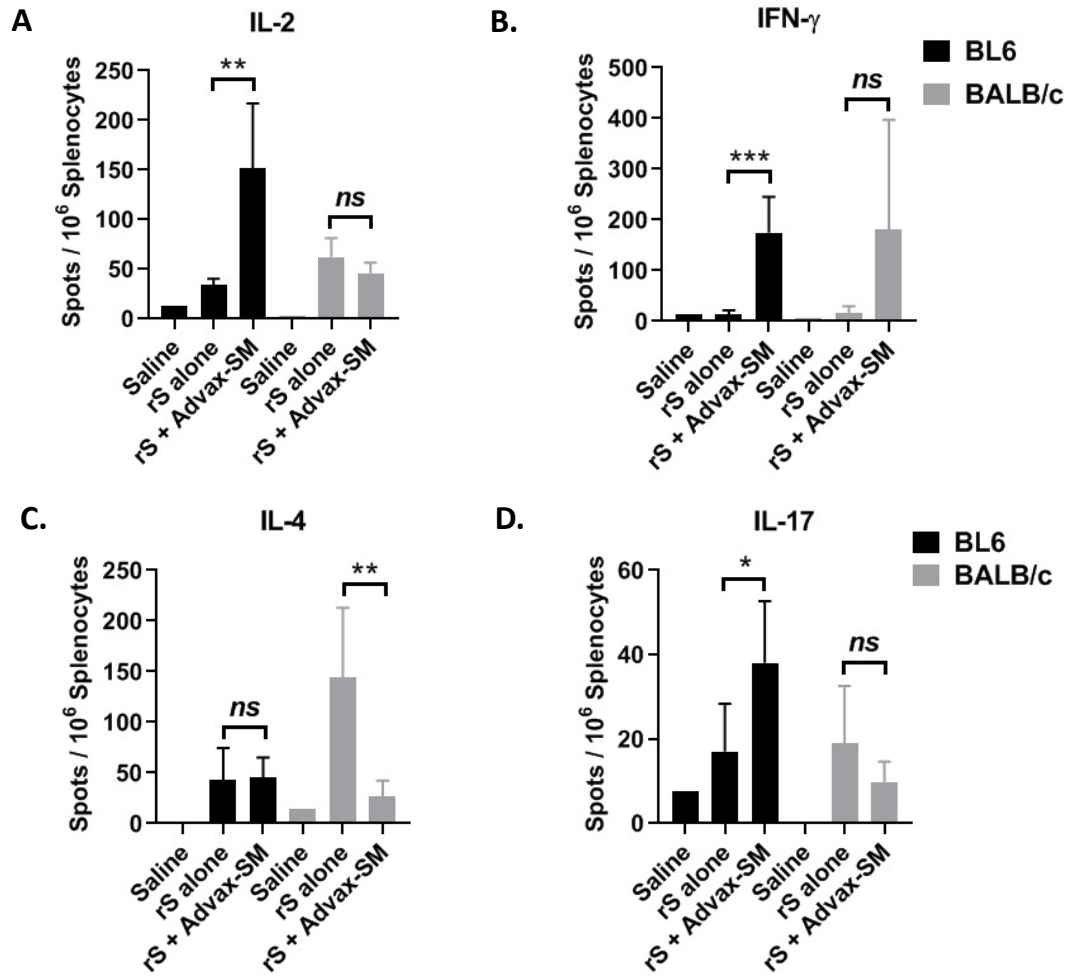



## Figure 6

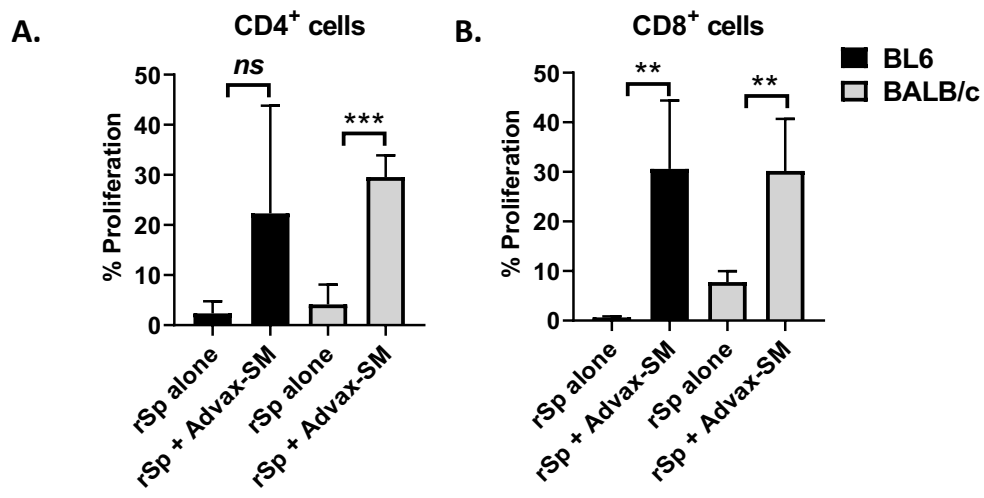

## Figure 7

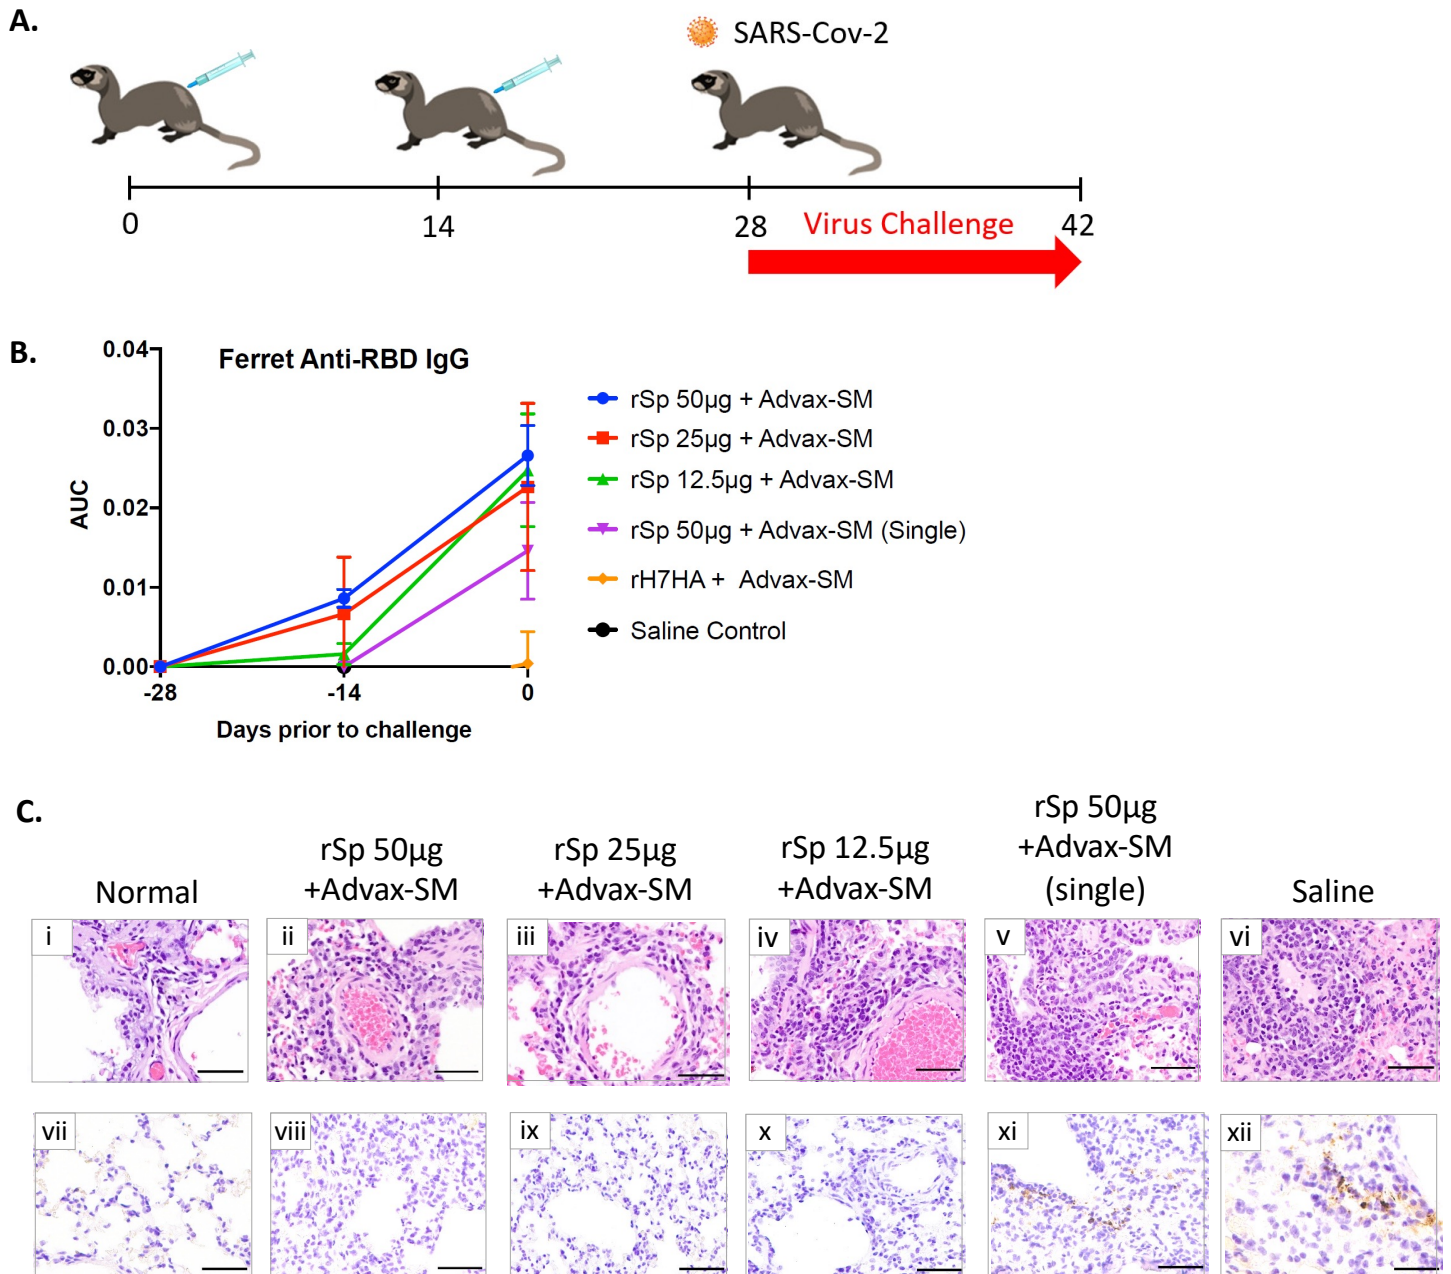

Immunisation of ferrets and mice with recombinant SARS-CoV-2 spike protein formulated with Advax-SM adjuvant protects against COVID-19 infection

Lei Li<sup>1,2^</sup>, Yoshikazu Honda-Okubo<sup>1,2^</sup>, Ying Huang<sup>3</sup>, Hyesun Jang<sup>3</sup>, Michael A. Carlock<sup>3</sup>, Jeremy Baldwin<sup>1</sup>, Sakshi Piplani<sup>1,2</sup>, Anne G. Bebin-Blackwell<sup>3</sup>, David Forgacs<sup>3</sup>, Kaori Sakamoto<sup>5</sup>, Alberto Stella<sup>6</sup>, Stuart Turville<sup>6</sup>, Tim Chataway<sup>2</sup>, Alex Colella<sup>2</sup>, Jamie Triccas<sup>7</sup>, Ted M Ross<sup>3, 4#</sup>, Nikolai Petrovsky<sup>1, 2#</sup>

**SUPPLEMENTARY MATERIAL**

**Supplementary Figure 1:** Advax-SM adjuvant enhances Cytotoxic T lymphocyte (CTL) activity and overcomes dominant Th2-bias compared to rSp antigen alone or together with Advax-SM adjuvant. Female BL6 mice were immunised i.m. twice at 2-week intervals with 1 µg rSp alone or with Advax-SM or 50 µg Al(OH)<sub>3</sub> adjuvant. Blood samples were collected at 2 weeks and spleens at 4 weeks after the last immunisation. Shown are CTL functional assay (A) and ELISA (B) results (mean + SD). Statistical analysis was done by Mann-Whitney test. \*, p < 0.05, ns; not significant.

**Supplementary Figure 2:** Co-administration of Advax-SM adjuvant enhances both vaccine-induced anti-rSp and anti-RBD antibodies in BALB/c mice. Shown are anti-rSp and anti-RBD antibodies measured by ELISA (mean + SD) in BALB/c mice. Statistical analysis was done by Mann-Whitney test. \*, p < 0.05, \*\*, p < 0.01.

**Supplementary Figure 3:** Neutralisation antibody titres determined by SARS-CoV-2 (S-CoV-2) Spike pseudotyped lentivirus-based platform and S-CoV-2 live virus. Correlation of NT titre and ELISA OD value in BL6 mice (A) and BALB/c mice (B).

**Supplementary Figure 4:** Correlation of S-CoV-2 and pseudotype neutralisation assays.

**Supplementary Figure 5:** SARS-CoV-2 disease pathology in immunised and control ferrets post-challenge. (A) Change in body weight measured over 10 days post infection with 1 X 10<sup>5</sup> PFU SARS-CoV-2 virus. (B) Lungs (n=3) were collected from each group at day 3 post-challenge, and histology sections were assessed by board-certified veterinary pathologist blinded to the groups for lung injury score and number of lesions.

# Supplementary Figure 1

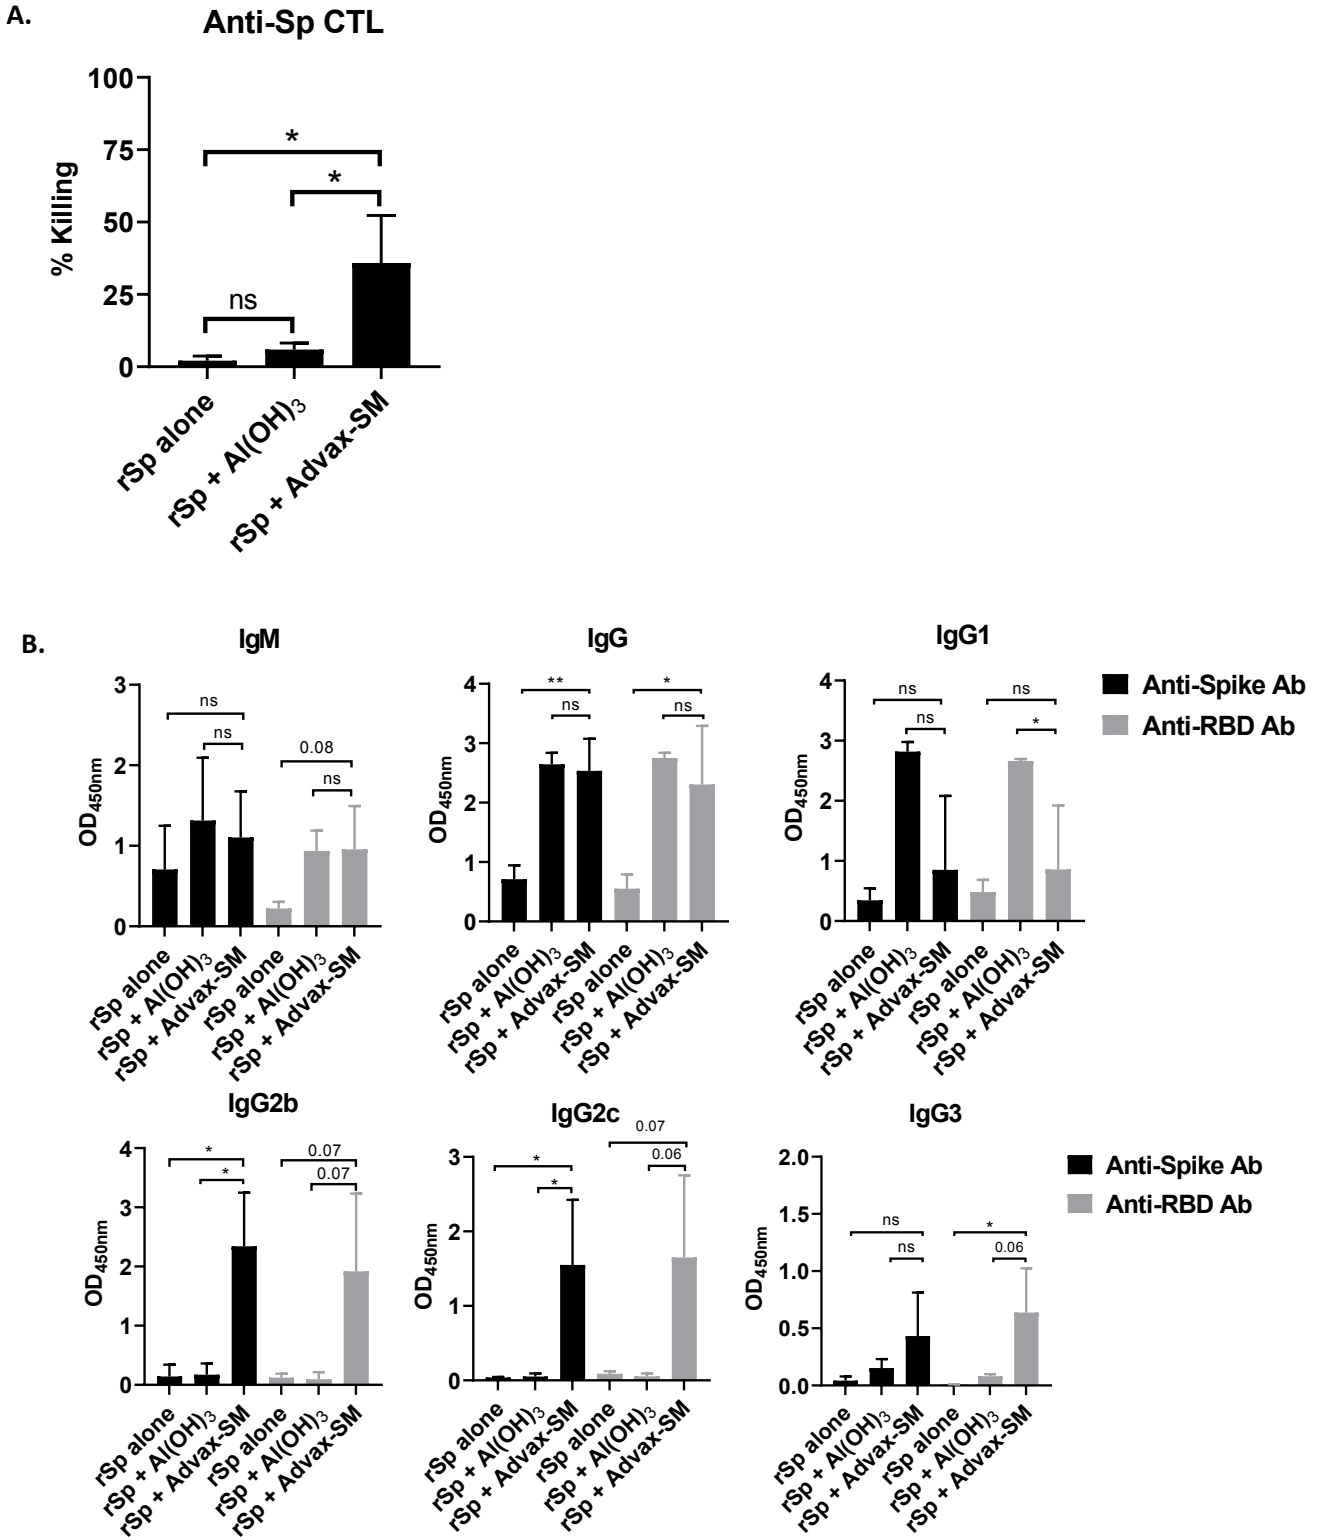

# Supplementary Figure 2

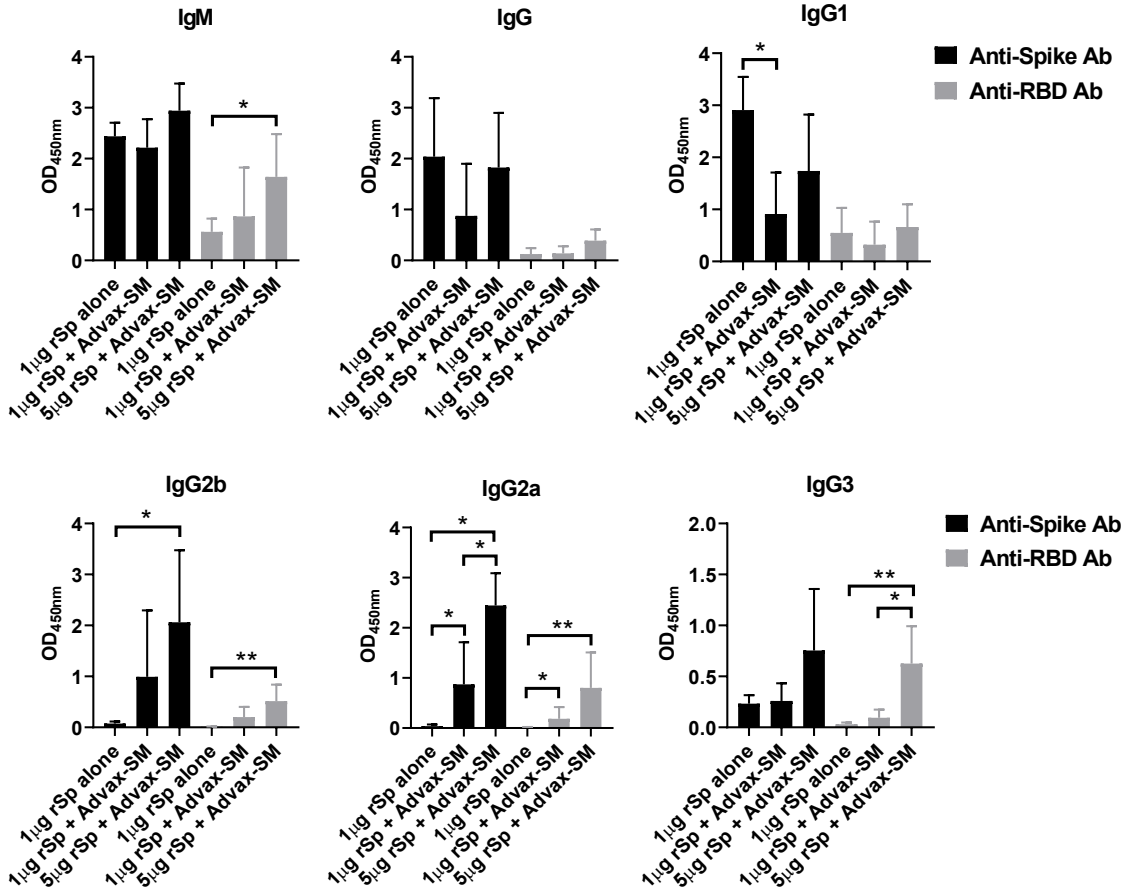

# Supplementary Figure 3

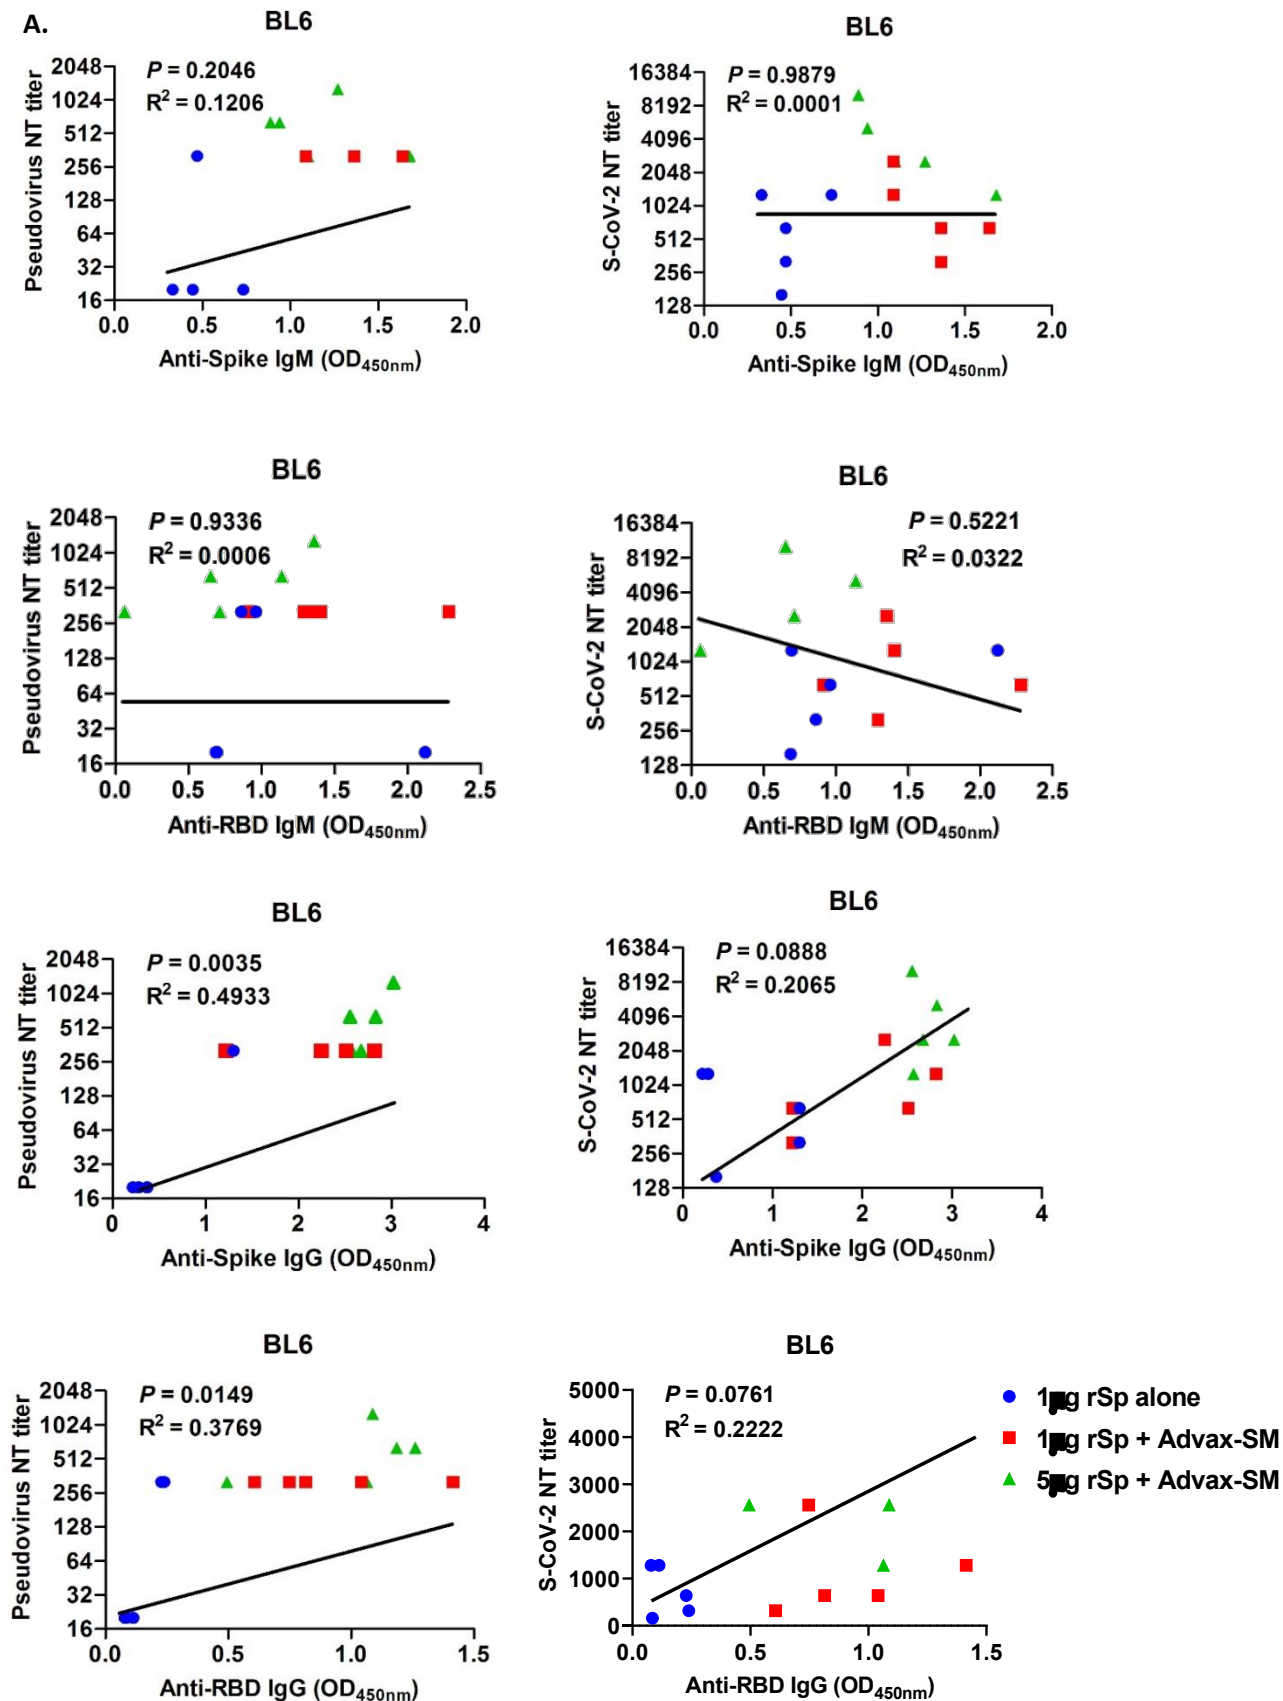

# Supplementary Figure 3 (cont.)

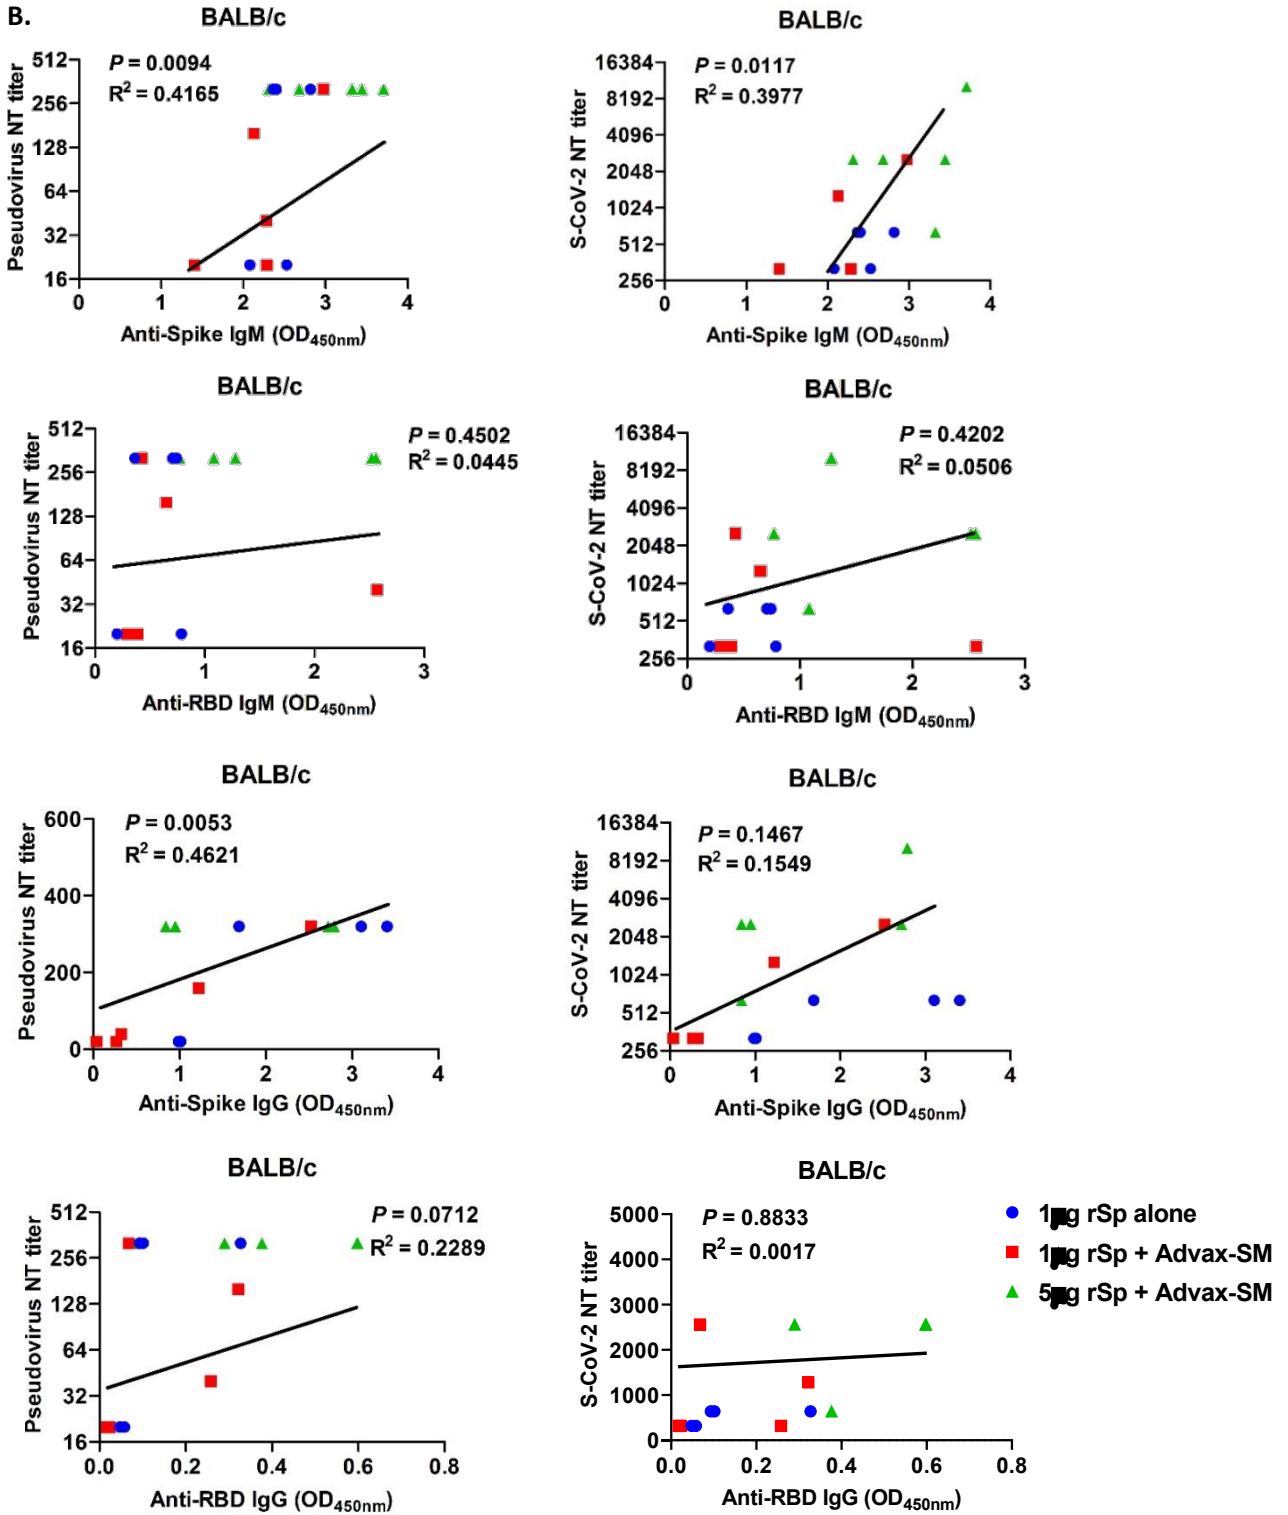



# Supplementary Figure 4

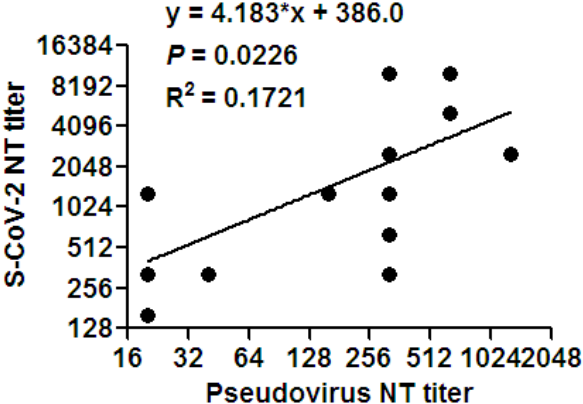

# Supplementary Figure 5

## A. SARS-CoV-2 infection

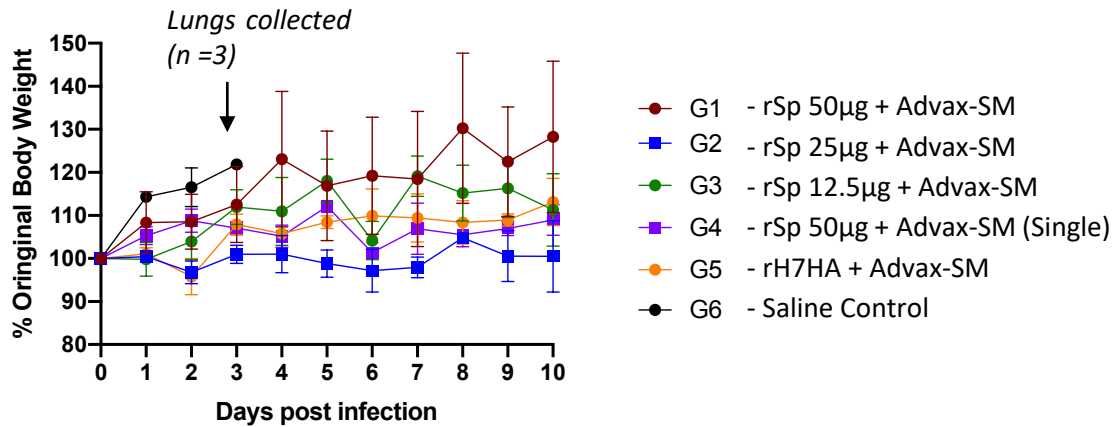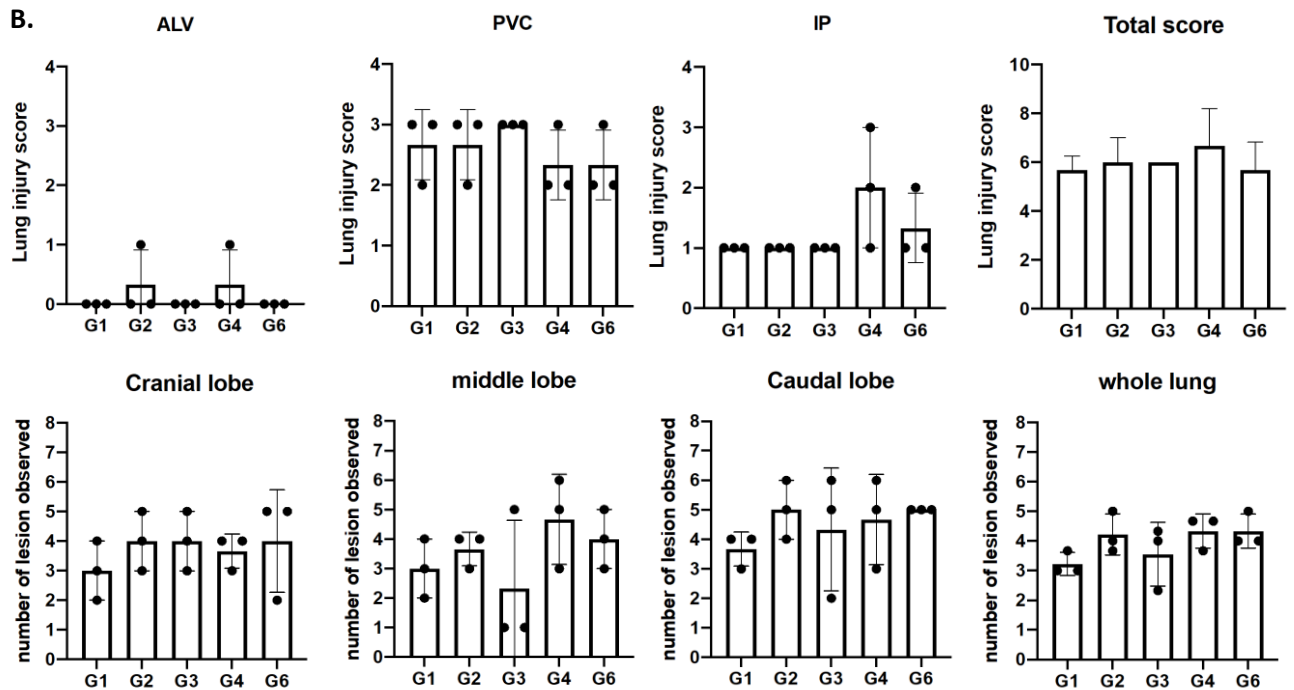

Source: https://www.biorxiv.org/content/biorxiv/early/2021/07/05/2021.07.03.451026.full.pdf
